# Supplementary material for: Chemically recyclable poly(thioether-thioester)s via ring-opening polymerization of seven-membered thiolactones
Source: Royal Society of Chemistry journal article supplement (doi:10.1039/d4py01442a), 2025-01-01
Supplement: d4py01442a1.pdf [file d4py01442a1.pdf]

Supporting Information for

## Chemically Recyclable Poly(thioether-thioester)s via Ring-Opening Polymerization of Seven-Membered Thiolactones

Long-Hai Liu,<sup>a</sup> Si-Qi Wang,<sup>a</sup> Hua-Zhong Fan,<sup>a</sup> Qing Cao,<sup>a</sup> Zhongzheng Cai,<sup>a\*</sup> and Jian-Bo Zhu<sup>a\*</sup>

<sup>a</sup>National Engineering Laboratory of Eco-Friendly Polymeric Materials (Sichuan), College of Chemistry, Sichuan University, Chengdu, 610064, P. R. China

|                                                                                                                                                                            |           |
|----------------------------------------------------------------------------------------------------------------------------------------------------------------------------|-----------|
| <b>Monomer Preparations</b> .....                                                                                                                                          | <b>4</b>  |
| <b>Scheme S1.</b> Synthesis of <b>M1</b> .....                                                                                                                             | 4         |
| <b>Scheme S2.</b> Synthesis of <b>M2</b> .....                                                                                                                             | 4         |
| <b>Fig. S1</b> <sup>1</sup> H NMR (CDCl <sub>3</sub> , 25 °C) spectrum of <b>M1</b> .....                                                                                  | 5         |
| <b>Fig. S2</b> <sup>1</sup> H NMR (CDCl <sub>3</sub> , 25 °C) spectrum of <b>M2</b> .....                                                                                  | 6         |
| <b>Fig. S3</b> <sup>13</sup> C NMR (CDCl <sub>3</sub> , 25 °C) spectrum of <b>M2</b> .....                                                                                 | 7         |
| <b>Fig. S4</b> X-ray structure of <b>M2</b> .....                                                                                                                          | 8         |
| <b>Table S1</b> Crystallographic table for <b>M2</b> .....                                                                                                                 | 9         |
| <b>General Polymerization Procedures</b> .....                                                                                                                             | <b>10</b> |
| <b>Table S2</b> Results of ROP of <b>M1</b> .....                                                                                                                          | 11        |
| <b>Table S3</b> Results of ROP of <b>M2</b> .....                                                                                                                          | 12        |
| <b>Polymer Characterization</b> .....                                                                                                                                      | <b>13</b> |
| <b>Fig. S5</b> <sup>1</sup> H NMR (CDCl <sub>3</sub> , 25 °C) spectrum of P( <b>M1</b> ) obtained by [M1]/ [TBD]/[I] = 500/1/1. ....                                       | 13        |
| <b>Fig. S6</b> <sup>13</sup> C NMR (CDCl <sub>3</sub> , 25 °C) spectrum of P( <b>M1</b> ) obtained by [M1]/ [TBD]/[I] = 500/1/1. ....                                      | 14        |
| <b>Fig. S7</b> <sup>1</sup> H NMR (CDCl <sub>3</sub> , 25 °C) spectrum of P( <b>M2</b> ) obtained by [M2]/ [TBD]/[I] = 500/1/1. ....                                       | 15        |
| <b>Fig. S8</b> <sup>13</sup> C NMR (CDCl <sub>3</sub> , 25 °C) spectrum of P( <b>M2</b> ) obtained by [M2]/ [TBD]/[I] = 500/1/1. ....                                      | 16        |
| <b>Fig. S9</b> TGA and DTG curves for P( <b>M1</b> ) obtained by [M1]/[TBD]/[I] = 500/1/1, T <sub>d</sub> = 293 °C, T <sub>max</sub> = 343 °C.....                         | 17        |
| <b>Fig. S10</b> TGA and DTG curves for P( <b>M2</b> ) obtained by [M2]/[TBD]/[I] = 500/1/1, T <sub>d</sub> = 275 °C, T <sub>max</sub> = 320 °C.....                        | 18        |
| <b>Fig. S11</b> DSC curves for P( <b>M1</b> ) obtained by [M1]/[TBD]/[I] = 500/1/1, T <sub>g</sub> = -49 °C, T <sub>m</sub> = 47 °C.....                                   | 19        |
| <b>Fig. S12</b> DSC curves for P( <b>M2</b> ) obtained by [M2]/[TBD]/[I] = 500/1/1, T <sub>g</sub> = -33 °C, T <sub>c</sub> = 46 °C, T <sub>m</sub> = 95 °C and 97 °C..... | 20        |
| <b>Fig. S13</b> SEC trace of P( <b>M1</b> ) obtained by [M1]/[TBD]/[I] = 200/1/1, M <sub>n</sub> = 44.0 kDa, Đ =                                                           |           |

|                                                                                                                                   |           |
|-----------------------------------------------------------------------------------------------------------------------------------|-----------|
| 1.43 .....                                                                                                                        | 21        |
| <b>Fig. S14</b> SEC trace of P( <b>M1</b> ) obtained by $[M1]/[TBD]/[I] = 1000/1/1$ , $M_n = 46.1$ kDa, $\bar{D} =$<br>1.43 ..... | 22        |
| <b>Fig. S15</b> SEC trace of P( <b>M2</b> ) obtained by $[M2]/[TBD]/[I] = 500/1/1$ , $M_n = 47.2$ kDa, $\bar{D} =$<br>1.51 .....  | 23        |
| <b>Fig. S16</b> SEC trace of P( <b>M2</b> ) obtained by $[M2]/[TBD]/[I] = 1000/1/1$ , $M_n = 220$ kDa, $\bar{D} =$<br>1.56 .....  | 24        |
| <b>Fig. S17</b> Powder XRD profiles of P( <b>M1</b> ). .....                                                                      | 25        |
| <b>Fig. S18</b> Powder XRD profiles of P( <b>M2</b> ). .....                                                                      | 26        |
| <b>Mechanical Property</b> .....                                                                                                  | <b>27</b> |
| <b>Table S4</b> Melt pressing temperature and $M_n$ and $\bar{D}$ before and after melt pressing. ....                            | 27        |
| <b>Fig. S19</b> Stress-strain curves of P( <b>M1</b> )s. ....                                                                     | 28        |
| <b>Table S5</b> Summary of mechanical properties of P( <b>M1</b> )s. ....                                                         | 28        |
| <b>Fig. S20</b> Stress-strain curves of P( <b>M2</b> )s. ....                                                                     | 29        |
| <b>Table S6</b> Summary of mechanical properties of P( <b>M2</b> )s. ....                                                         | 29        |
| <b>The Hydrolytic Stability Study</b> .....                                                                                       | <b>30</b> |
| <b>Fig. S21</b> The polymer weight change curves of P( <b>M1</b> ). ....                                                          | 30        |
| <b>Fig. S22</b> The polymer weight change curves of P( <b>M1</b> ). ....                                                          | 30        |
| <b>Fig. S23</b> The polymer weight change curves of P( <b>M2</b> ). ....                                                          | 31        |
| <b>Fig. S24</b> $^1H$ NMR ( $CDCl_3$ , 25 °C) spectrum of <b>M1</b> after 5 weeks. ....                                           | 32        |
| <b>Fig. S25</b> $^1H$ NMR ( $CDCl_3$ , 25 °C) spectrum of <b>M2</b> after 5 weeks. ....                                           | 32        |
| <b>Thermodynamic Study</b> .....                                                                                                  | <b>33</b> |
| <b>Table S7</b> Raw data over equilibrium conversion at various temperatures for <b>M1</b> . ....                                 | 34        |
| <b>Fig. S26</b> Van't Hoff plot of $\ln[M1]_{eq}$ vs. reciprocal of the absolute temperature ( $T^{-1}$ ). ....                   | 34        |
| <b>Table S8</b> Raw data over equilibrium conversion at various temperatures for <b>M2</b> . ....                                 | 35        |
| <b>Fig. S27</b> Van't Hoff plot of $\ln[M2]_{eq}$ vs. reciprocal of the absolute temperature ( $T^{-1}$ ). ....                   | 35        |
| <b>Bulk Thermal Chemical Recycle to Monomer</b> .....                                                                             | <b>36</b> |
| <b>Fig. S28</b> Thermal depolymerization of polymers to monomers via sublimation. ....                                            | 36        |
| <b>Table S9</b> Results of bulk thermal depolymerization of P( <b>M1</b> ). ....                                                  | 37        |
| <b>Fig. S29</b> $^1H$ NMR spectra of the recycled <b>M1</b> by the thermal depolymerization of<br>P( <b>M1</b> ). ....            | 37        |
| <b>Table S10</b> Results of bulk thermal depolymerization of P( <b>M2</b> ). ....                                                 | 38        |
| <b>Table S11</b> Results for depolymerization of P( <b>M2</b> ) in dilute solution. ....                                          | 39        |
| <b>Fig. S30</b> $^1H$ NMR spectra of the recycled <b>M2</b> by the dilute solution depolymerization of<br>P( <b>M2</b> ). ....    | 39        |
| <b>Table S12</b> Results of repolymerization of recycled <b>M1</b> . ....                                                         | 40        |
| <b>Metal ion adsorption study with P(M1)</b> .....                                                                                | <b>41</b> |
| <b>General procedure for the preparation of 60 ppm metal ion solution</b> . ....                                                  | 41        |
| <b>General procedure of metal ion removal analysis</b> . ....                                                                     | 41        |
| <b>Table S13</b> Adsorption of metal ions with P( <b>M1</b> ). ....                                                               | 42        |
| <b>Table S14</b> Adsorption of metal ions with P( <b>M1</b> ) in mixed metal ions. ....                                           | 42        |
| <b>Table S15</b> $Au^{3+}$ Adsorption with P( <b>M1</b> ). ....                                                                   | 43        |

|                                                                                                                            |           |
|----------------------------------------------------------------------------------------------------------------------------|-----------|
| <b>General procedure for the CRM of polymers under bulk thermal in vacuum.....</b>                                         | <b>44</b> |
| <b>Table S16</b> Results of bulk thermal chemical recycling of P( <b>M1</b> ) - Au <sup>3+</sup> .....                     | <b>44</b> |
| <b>Fig. S31</b> <sup>1</sup> H NMR (CDCl <sub>3</sub> , 25 °C) spectrum of recycled <b>M1</b> after depolymerization. .... | <b>44</b> |
| <b>MALDI-TOF MS of P(M1).....</b>                                                                                          | <b>45</b> |
| <b>Fig. S32</b> MALDI-TOF MS spectrum of the low-molecular-weight P( <b>M1</b> ). ....                                     | <b>45</b> |
| <b>Reference .....</b>                                                                                                     | <b>45</b> |

## Monomer Preparations

### Scheme S1. Synthesis of M1

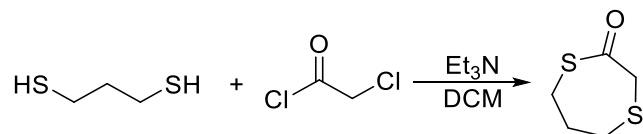

To a solution of 1,3-dimercaptopropane (5.4 g, 50 mmol) and Et<sub>3</sub>N (10.6 g, 105 mmol) in 200 mL of dried DCM was slowly added a solution of chloroacetyl chloride (4.2 g, 55 mmol) in 100 mL of DCM at -70 °C under Argon. The resulting solution was stirred for 8 h at 40 °C, and 40 mL ice water was added to quench the reaction. During the addition all the precipitated triethylamine hydrochloride was dissolved, and a two-phase system was formed. The organic phase was washed with water (4 × 100 mL) and dried over anhydrous Na<sub>2</sub>SO<sub>4</sub>. The solution was filtered and concentrated under reduced pressure. The residue was purified by column chromatography on silica gel (PE/DCM = 5/1) to give the final compound as white solid (2.1 g, 29% yield).<sup>1</sup> The pure product as colorless crystal was obtained by recrystallization from ethyl acetate. <sup>1</sup>H NMR (400 MHz, CDCl<sub>3</sub>) δ 3.59 (s, 2H), 3.12–3.05 (m, 2H), 2.97–2.90 (m, 2H), 2.46–2.38 (m, 2H).

### Scheme S2. Synthesis of M2

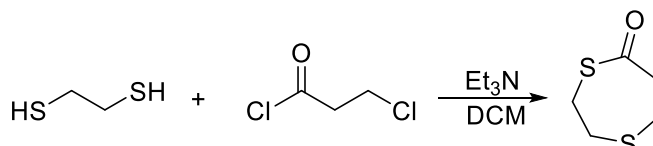

To a solution of 1,2-ethanedithiol (4.7 g, 50 mmol) and Et<sub>3</sub>N (10.6 g, 105 mmol) in 200 mL of dried DCM was slowly added a solution of 3-chloropropionyl chloride (7.0 g, 55 mmol) in 100 mL of DCM at -70 °C under Argon. The resulting solution was stirred for 2 h at 40 °C, and 40 mL ice water was added to quench the reaction. During the addition all the precipitated triethylamine hydrochloride was dissolved, and a two-phase system was formed. The organic phase was washed with water (4 × 100 mL) and dried over anhydrous Na<sub>2</sub>SO<sub>4</sub>. The solution was filtered and concentrated under reduced pressure. The residue was purified by column chromatography on silica gel (PE/DCM = 4/1) to give the final compound as white solid (0.4 g, 5% yield). The pure product as colorless crystal was obtained by recrystallization from ethyl acetate. <sup>1</sup>H NMR (400 MHz, CDCl<sub>3</sub>) δ 3.47–3.39 (m, 2H), 3.34–3.27 (m, 2H), 3.21–3.14 (m, 2H), 2.86–2.79 (m, 2H). <sup>13</sup>C NMR (101 MHz, CDCl<sub>3</sub>) δ 204.19, 50.16, 34.20, 34.00, 24.65.

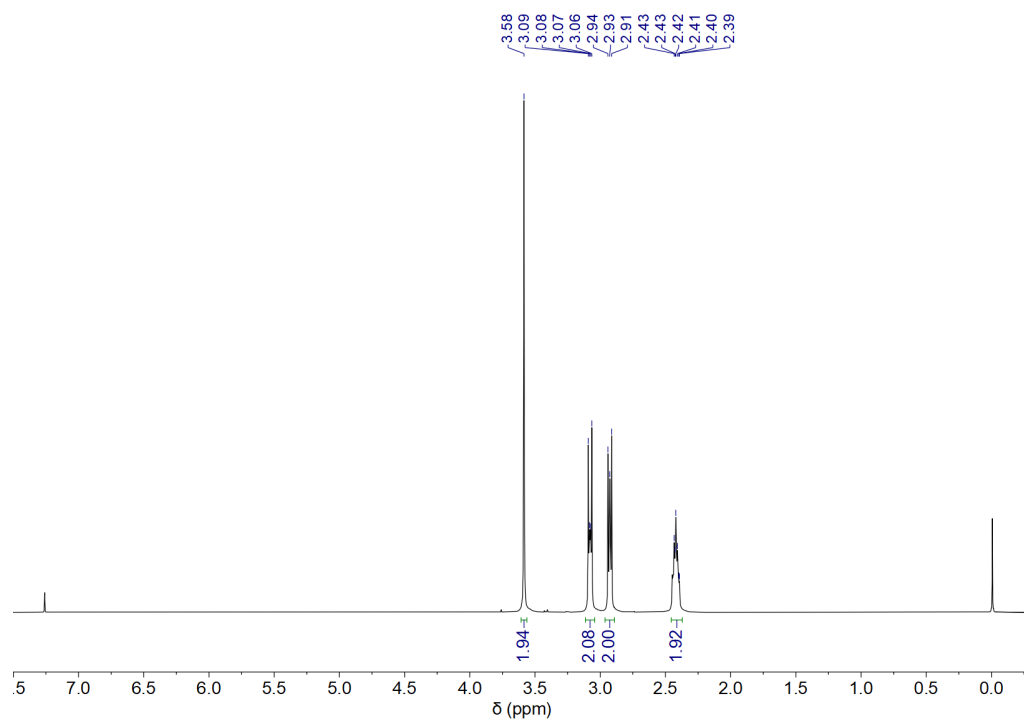

**Fig. S1**  $^1\text{H}$  NMR ( $\text{CDCl}_3$ , 25  $^\circ\text{C}$ ) spectrum of **M1**.

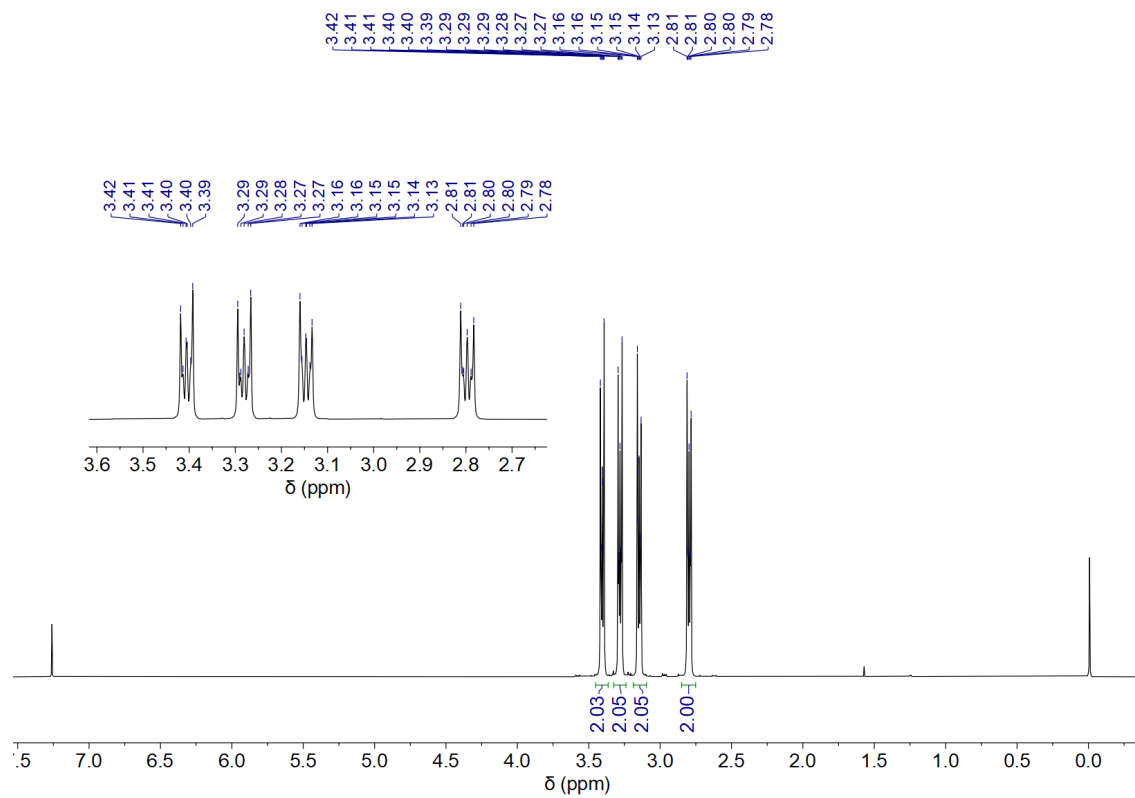

**Fig. S2**  $^1\text{H}$  NMR ( $\text{CDCl}_3$ ,  $25\text{ }^\circ\text{C}$ ) spectrum of **M2**.

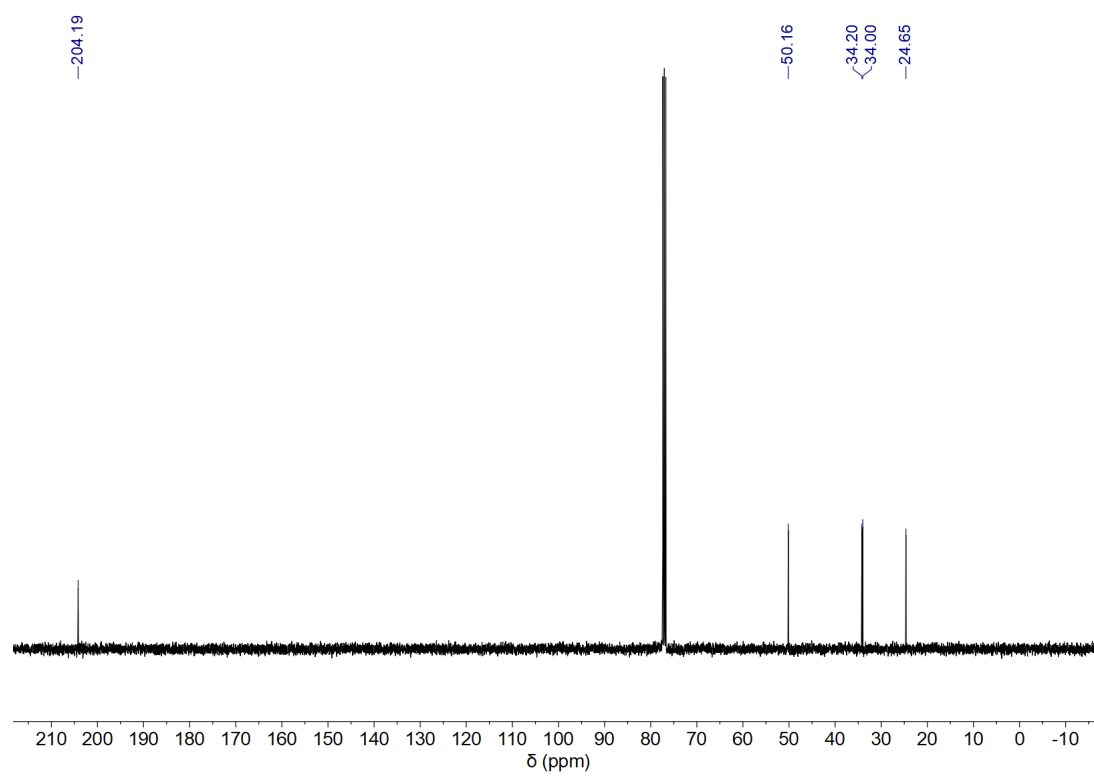

**Fig. S3**  $^{13}\text{C}$  NMR ( $\text{CDCl}_3$ , 25 °C) spectrum of **M2**.

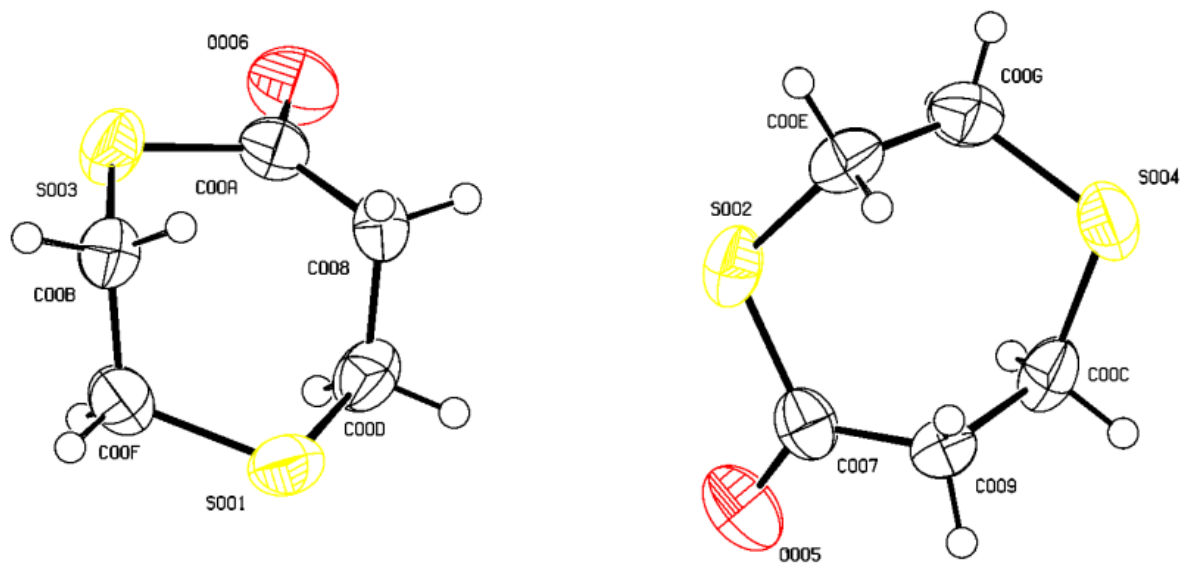

**Fig. S4** X-ray structure of **M2**.



**Table S1** Crystallographic table for **M2**.

| <b>M2</b>                                   |                                                               |
|---------------------------------------------|---------------------------------------------------------------|
| CCDC number                                 | 2354510                                                       |
| Empirical formula                           | C <sub>5</sub> H <sub>8</sub> O <sub>5</sub> S <sub>2</sub>   |
| Formula weight                              | 148.23                                                        |
| Temperature/K                               | 285.0                                                         |
| Crystal system                              | triclinic                                                     |
| Space group                                 | P-1                                                           |
| a/Å                                         | 8.2387(12)                                                    |
| b/Å                                         | 8.2964(13)                                                    |
| c/Å                                         | 10.4688(17)                                                   |
| α/°                                         | 93.346(6)                                                     |
| β/°                                         | 92.138(5)                                                     |
| γ/°                                         | 109.112(5)                                                    |
| Volume/Å <sup>3</sup>                       | 673.76(18)                                                    |
| Z                                           | 4                                                             |
| ρ <sub>calc</sub> /cm <sup>3</sup>          | 1.461                                                         |
| μ/mm <sup>-1</sup>                          | 0.688                                                         |
| F(000)                                      | 312.0                                                         |
| Crystal size/mm <sup>3</sup>                | 0.42 × 0.22 × 0.21                                            |
| Radiation                                   | MoKα (λ = 0.71073)                                            |
| 2θ range for data collection/°              | 3.904 to 55.182                                               |
| Index ranges                                | -10 ≤ h ≤ 10, -10 ≤ k ≤ 10, -13 ≤ l ≤ 13                      |
| Reflections collected                       | 13114                                                         |
| Independent reflections                     | 3089 [R <sub>int</sub> = 0.0497, R <sub>sigma</sub> = 0.0410] |
| Data/restraints/parameters                  | 3089/0/145                                                    |
| Goodness-of-fit on F <sup>2</sup>           | 1.052                                                         |
| Final R indexes [I ≥ 2σ (I)]                | R <sub>1</sub> = 0.0453, wR <sub>2</sub> = 0.1110             |
| Final R indexes [all data]                  | R <sub>1</sub> = 0.0657, wR <sub>2</sub> = 0.1200             |
| Largest diff. peak/hole / e Å <sup>-3</sup> | 0.32/-0.32                                                    |

## General Polymerization Procedures

Polymerization reactions were performed in 4 mL glass vials inside the glovebox for ambient temperature runs. In a typical polymerization reaction, the solution of catalyst in DCM or toluene was added to the vigorously stirred prepared monomer and initiator (benzyl mercaptan) solution in DCM or toluene. After a desired period of time, the polymerization was quenched by addition of 1 mL  $\text{CDCl}_3$  with benzoic acid (1 wt.%). The quenched mixture precipitated into 50 mL of cold methanol, filtered, and washed with cold methanol. This procedure was repeated twice to ensure any catalyst residue or unreacted monomer was removed. The polymer was dried in a vacuum oven at 60 °C to a constant weight.

**Table S2** Results of ROP of **M1**.<sup>[a]</sup>

| Entry | Cat.      | [ <b>M1</b> ]:[Cat.]:[I] | Time (min) | Conv. <sup>[b]</sup> (%) | $M_{n,Calcd}$ <sup>[c]</sup> (kDa) | $M_{n,SEC}$ <sup>[d]</sup> (kDa) | $\mathcal{D}$ <sup>[d]</sup> |
|-------|-----------|--------------------------|------------|--------------------------|------------------------------------|----------------------------------|------------------------------|
| 1     | TBD       | 100:1:1                  | 1          | 93                       | 13.8                               | 8.8                              | 1.40                         |
| 2     | TBD       | 200:1:1                  | 1          | 93                       | 27.5                               | 13.7                             | 1.41                         |
| 3     | TBD       | 500:1:1                  | 5          | 94                       | 69.6                               | 45.9                             | 1.54                         |
| 4     | TBD       | 1000:1:1                 | 10         | 95                       | 141                                | 62.1                             | 1.65                         |
| 5     | TBD       | 2000:1:1                 | 60         | 21                       | 62.2                               | 26.9                             | 2.04                         |
| 6     | TBD       | 2000:1:2                 | 60         | 44                       | 130                                | 40.6                             | 1.71                         |
| ----- |           |                          |            |                          |                                    |                                  |                              |
| 7     | DBU       | 500:1:1                  | 1          | 10                       | 7.40                               | 7.54                             | 1.19                         |
| 8     | DBU       | 500:1:1                  | 10         | 31                       | 22.9                               | 20.0                             | 1.30                         |
| 9     | DBU       | 500:1:1                  | 60         | 73                       | 54.0                               | 33.9                             | 1.92                         |
| ----- |           |                          |            |                          |                                    |                                  |                              |
| 10    | <b>La</b> | 1000:1:0                 | 180        | 17                       | -                                  | 18.7                             | 1.84                         |
| 11    | <b>La</b> | 1000:1:3                 | 180        | 12                       | 5.9                                | 24.7                             | 1.51                         |

[a] Condition: **M** = 50 mg, [M] = 1.1 mol/L, initiator (I) = Benzyl Mercaptan, solvent = DCM, RT. [b] Monomer conversion measured by <sup>1</sup>H NMR of the quenched solution. [c] Calculated from  $[M]_0/[BnSH]_0 \times Conv. \times MW_M + MW_{BnSH}$ . [d] Number-average molecular weight ( $M_n$ ) and dispersity index ( $\mathcal{D} = M_w/M_n$ ), determined by Size-Exclusion Chromatography (SEC) at 40 °C in THF.

**Table S3** Results of ROP of **M2**.<sup>[a]</sup>

| Entry | Cat. | [M2]:[Cat.]:[I] | Time (min) | Conv. <sup>[a]</sup> (%) | $M_{n,Calcd}$ <sup>[c]</sup> (kDa) | $M_{n,SEC}$ <sup>[d]</sup> (kDa) | $\mathcal{D}$ <sup>[d]</sup> |
|-------|------|-----------------|------------|--------------------------|------------------------------------|----------------------------------|------------------------------|
| 1     | TBD  | 100:1:1         | 1          | 97                       | 14.4                               | 28.1                             | 1.58                         |
| 2     | TBD  | 200:1:1         | 1          | 97                       | 28.7                               | 47.2                             | 1.51                         |
| 3     | TBD  | 500:1:1         | 5          | 88                       | 65.1                               | 182                              | 1.57                         |
| 4     | TBD  | 500:1:1         | 10         | 98                       | 72.5                               | 101                              | 1.55                         |
| 5     | TBD  | 1000:1:1        | 20         | 80                       | 118                                | 247                              | 1.67                         |
| 6     | TBD  | 1000:1:1        | 60         | 97                       | 144                                | 220                              | 1.56                         |
| 7     | TBD  | 2000:1:1        | 120        | 77                       | 228                                | 256                              | 1.62                         |

[a] Condition: **M** = 50 mg, [M] = 1.1 mol/L, initiator (I) = benzyl mercaptan, solvent = DCM, RT. [b] Monomer conversion measured by <sup>1</sup>H NMR of the quenched solution. [c] Calculated from  $[\mathbf{M}]_0/[\text{BnSH}]_0 \times \text{Conv.} \times \text{MW}_{\mathbf{M}} + \text{MW}_{\text{BnSH}}$ . [d] Number-average molecular weight ( $M_n$ ) and dispersity index ( $\mathcal{D} = M_w/M_n$ ), determined by size-exclusion chromatography (SEC) at 27 °C in DCM.

## Polymer Characterization

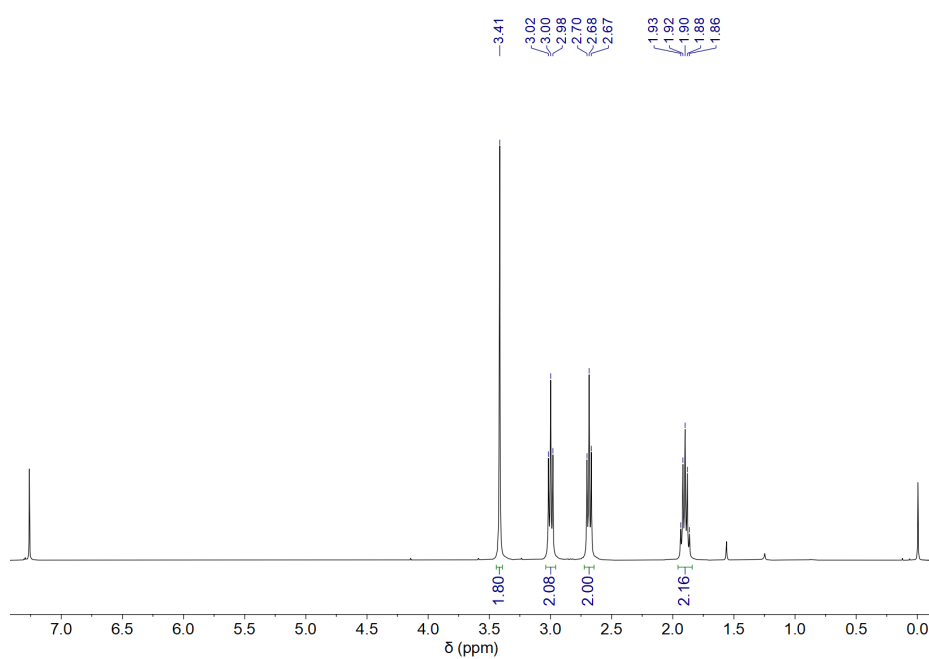

**Fig. S5**  $^1\text{H}$  NMR ( $\text{CDCl}_3$ ,  $25\text{ }^\circ\text{C}$ ) spectrum of P(M1) obtained by  $[\text{M1}]/[\text{TBD}]/[\text{I}] = 500/1/1$ .

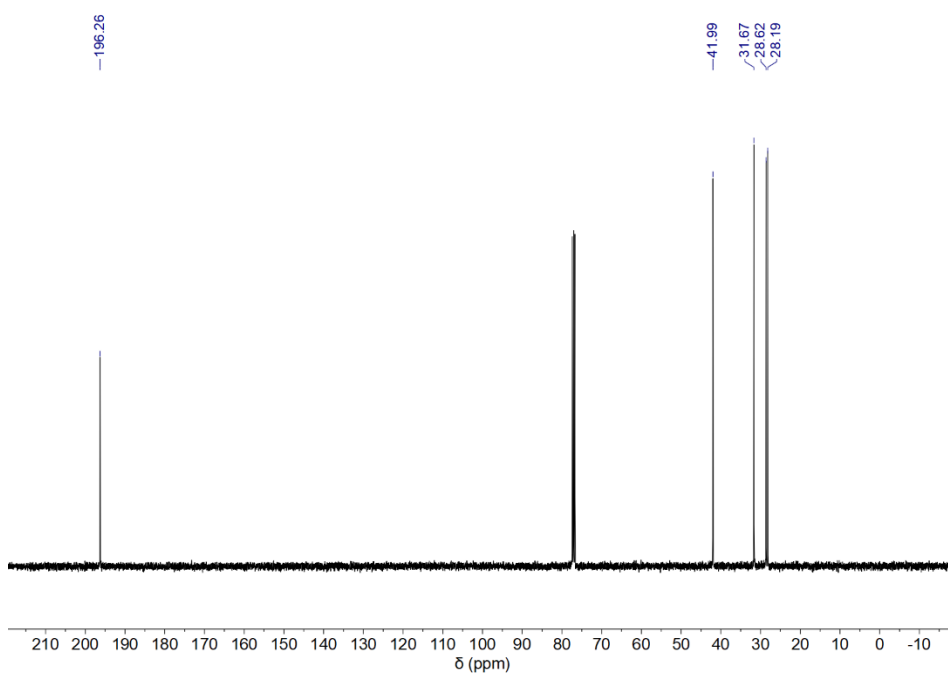

**Fig. S6** <sup>13</sup>C NMR (CDCl<sub>3</sub>, 25 °C) spectrum of P(**M1**) obtained by [**M1**]/ [TBD]/[I] = 500/1/1.

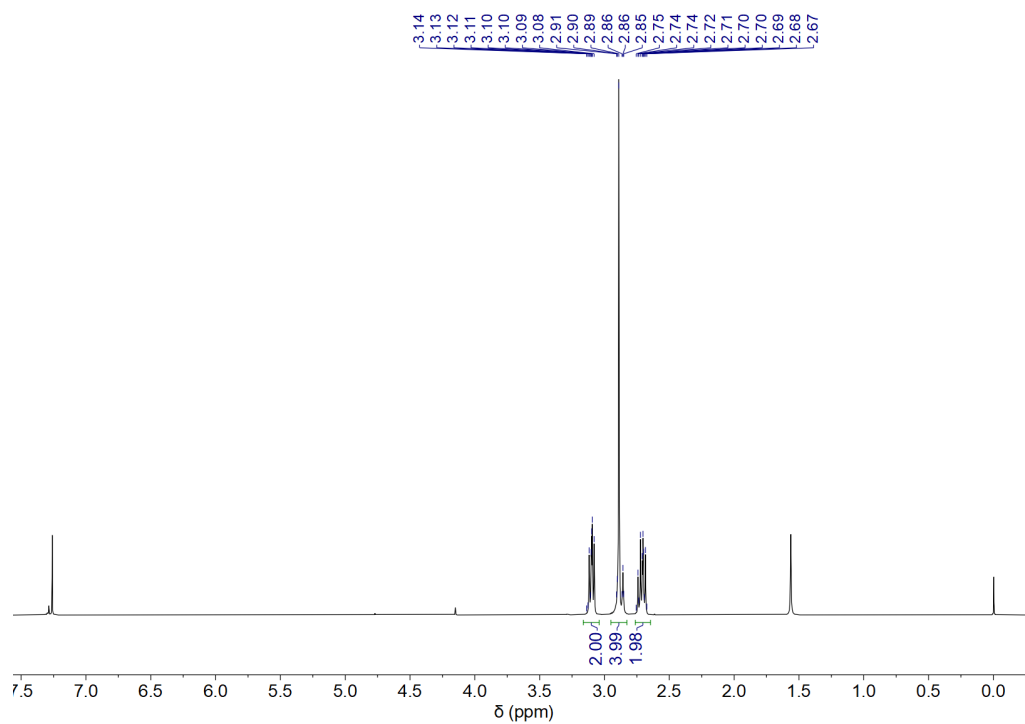

**Fig. S7**  $^1\text{H}$  NMR ( $\text{CDCl}_3$ , 25  $^\circ\text{C}$ ) spectrum of P(**M2**) obtained by  $[\text{M2}]/[\text{TBD}]/[\text{I}] = 500/1/1$ .

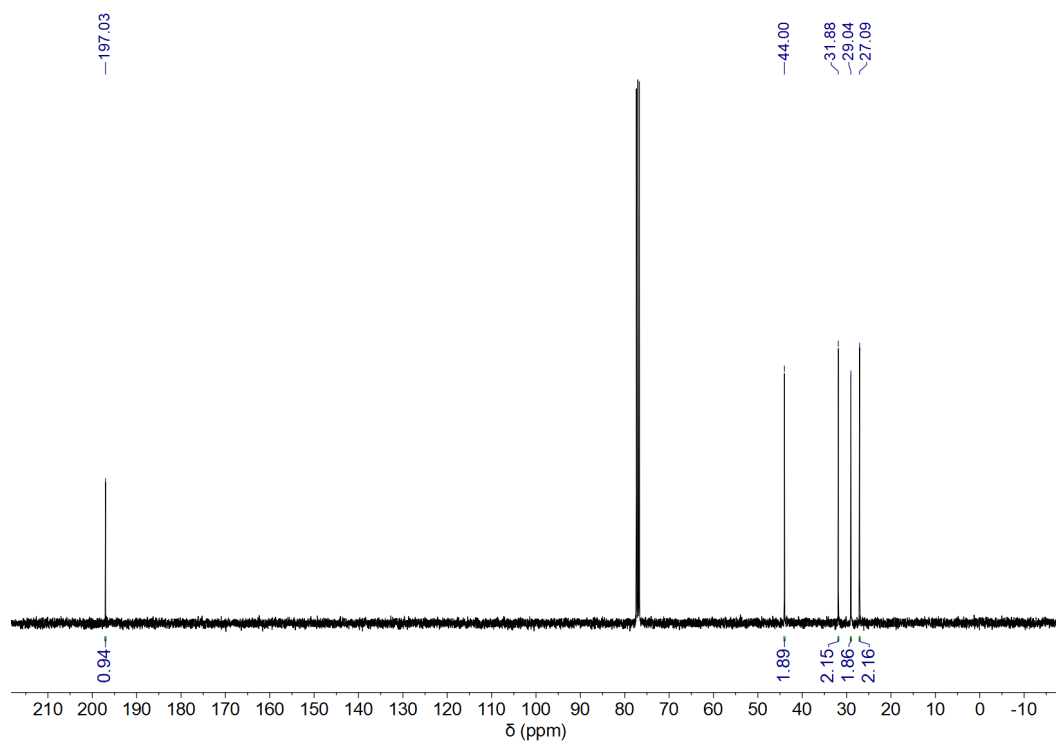

**Fig. S8**  $^{13}\text{C}$  NMR ( $\text{CDCl}_3$ ,  $25\text{ }^\circ\text{C}$ ) spectrum of P(M2) obtained by  $[\text{M2}]/[\text{TBD}]/[\text{I}] = 500/1/1$ .



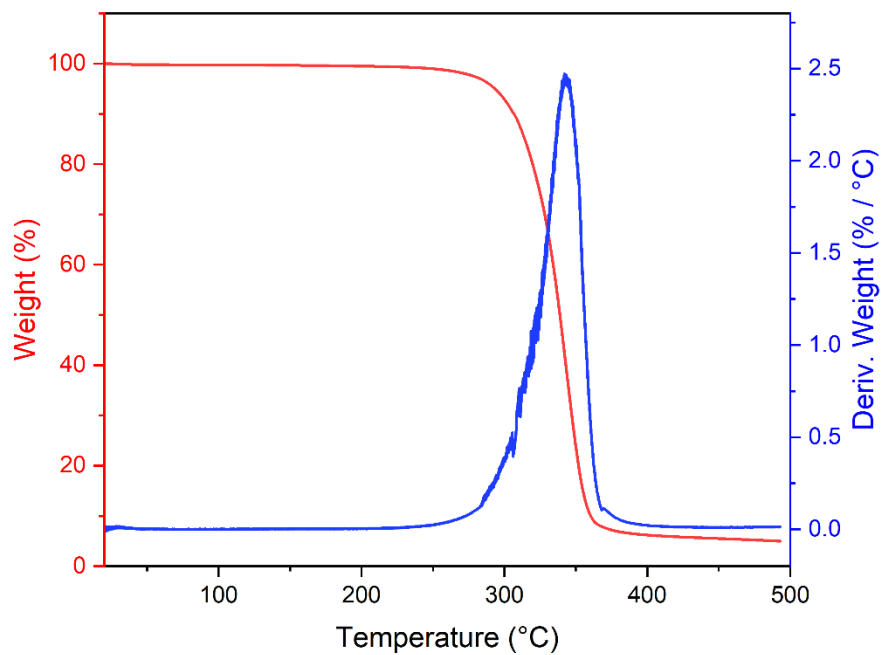

**Fig. S9** TGA and DTG curves for P(M1) obtained by  $[M1]/[TBD]/[I] = 500/1/1$ ,  $T_d = 293$  °C,  $T_{max} = 343$  °C.

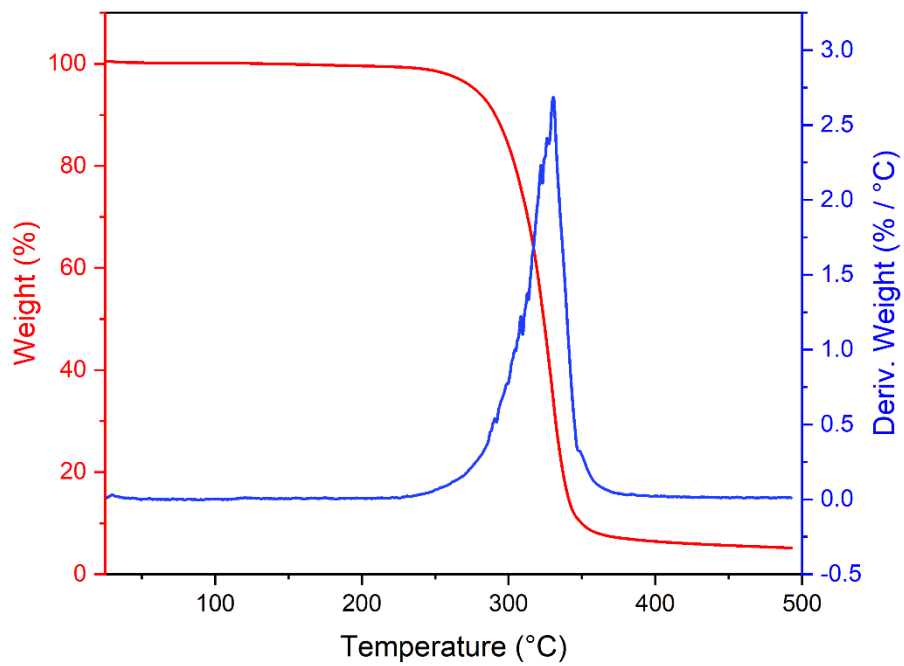

**Fig. S10** TGA and DTG curves for P(**M2**) obtained by  $[M2]/[TBD]/[I] = 500/1/1$ ,  $T_d = 275$  °C,  $T_{max} = 320$  °C.

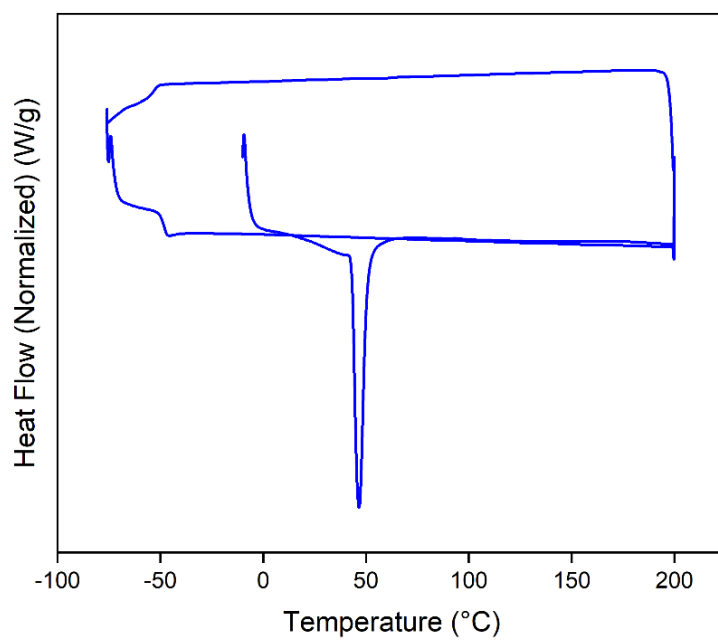

**Fig. S11** DSC curves for P(**M1**) obtained by [M1]/[TBD]/[I] = 500/1/1,  $T_g = -49$  °C,  $T_m = 47$  °C.

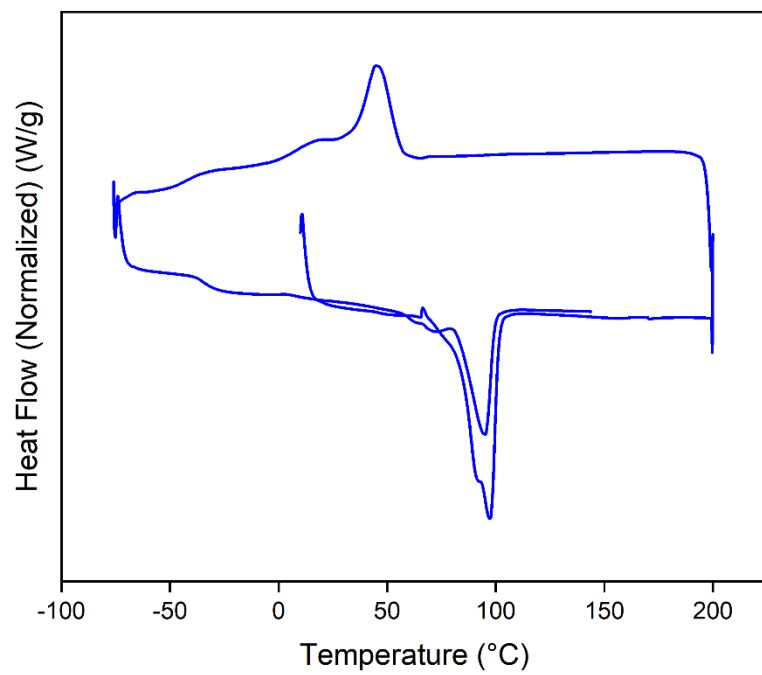

**Fig. S12** DSC curves for P(M2) obtained by [M2]/[TBD]/[I] = 500/1/1,  $T_g = -33$  °C,  $T_c = 46$  °C,  $T_m = 95$  °C and 97 °C.

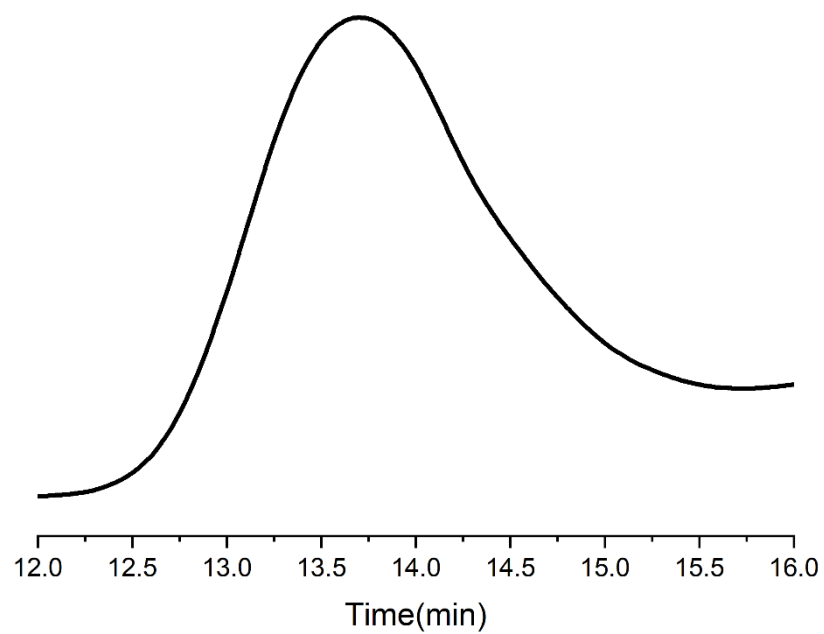

**Fig. S13** SEC trace of P(**M1**) obtained by  $[M1]/[TBD]/[I] = 200/1/1$ ,  $M_n = 44.0$  kDa,  $\mathcal{D} = 1.43$

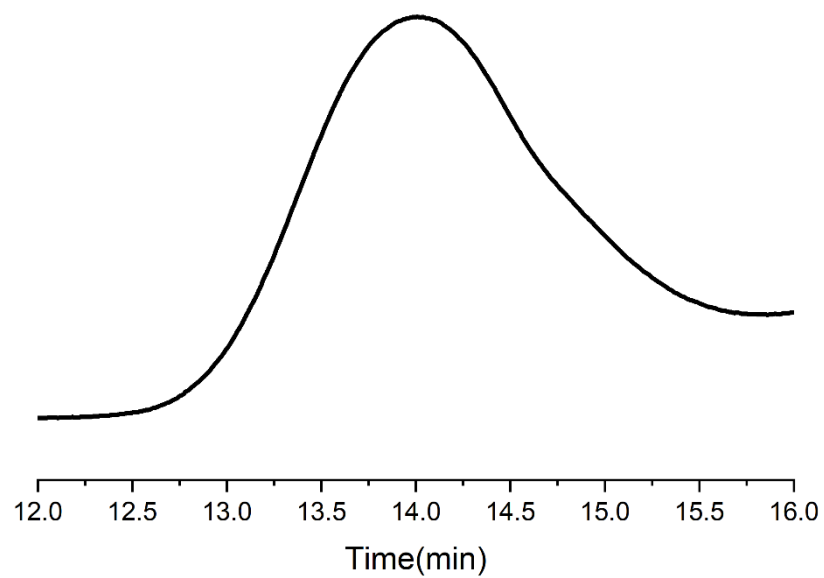

**Fig. S14** SEC trace of P(**M1**) obtained by  $[M1]/[TBD]/[I] = 1000/1/1$ ,  $M_n = 46.1$  kDa,  $\bar{D} = 1.43$

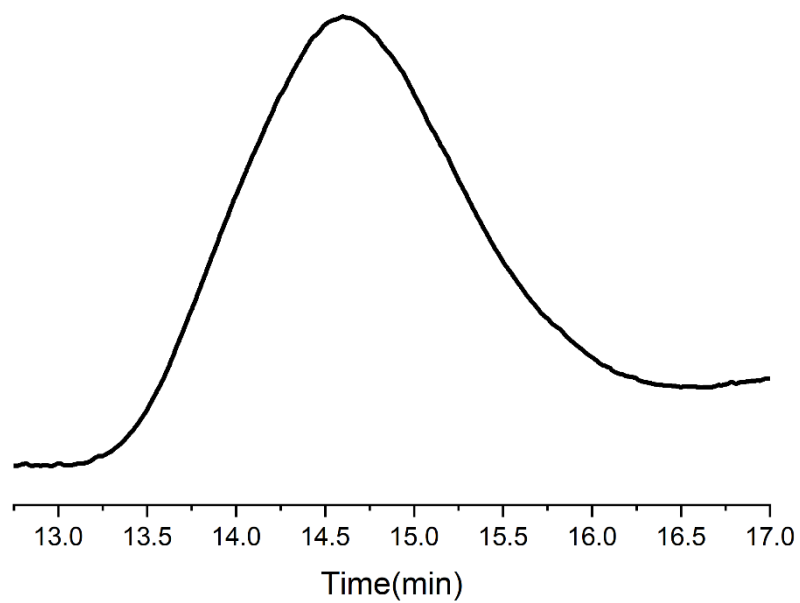

**Fig. S15** SEC trace of P(**M2**) obtained by  $[M2]/[TBD]/[I] = 500/1/1$ ,  $M_n = 47.2$  kDa,  $\mathcal{D} = 1.51$

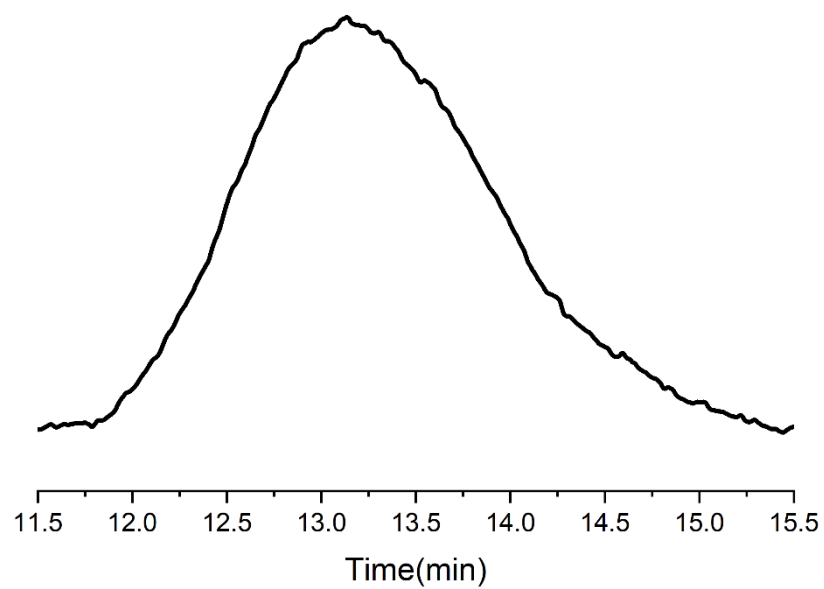

**Fig. S16** SEC trace of P(M2) obtained by  $[M2]/[TBD]/[I] = 1000/1/1$ ,  $M_n = 220$  kDa,  $\mathcal{D} = 1.56$



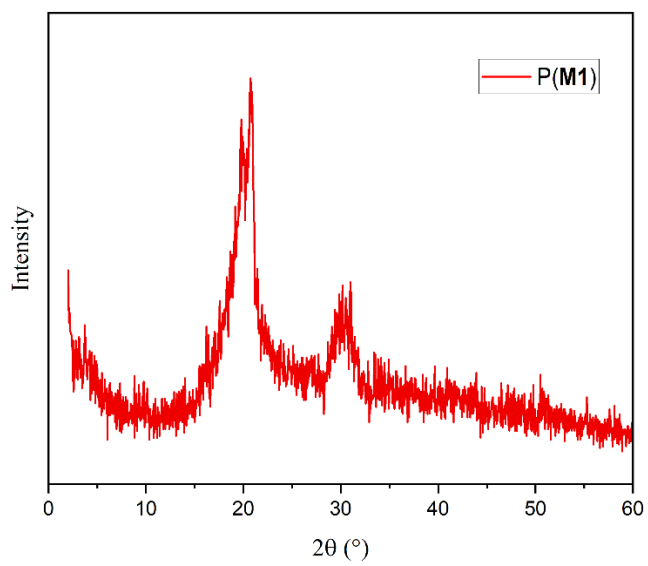

**Fig. S17** Powder XRD profiles of P(M1).

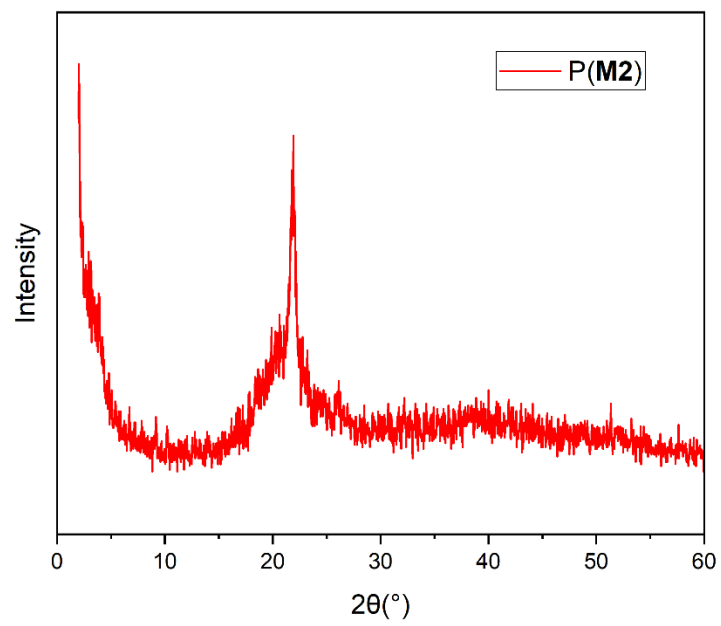

**Fig. S18** Powder XRD profiles of P(M2).

## Mechanical Property

Tensile stress/strain testing was performed by an Instron 5967 universal testing system. Samples were made by hot pressure in a steel mold (50 × 60 × 0.6 mm<sup>3</sup>) and were stretched at a strain rate of 10 mm/min at ambient temperature until break.

**Table S4** Melt pressing temperature and  $M_n$  and  $\bar{D}$  before and after melt pressing.

| Sample | Pressing temperature (°C) | before pressing |           | after pressing |           |
|--------|---------------------------|-----------------|-----------|----------------|-----------|
|        |                           | $M_n$ (kDa)     | $\bar{D}$ | $M_n$ (kDa)    | $\bar{D}$ |
| P(M1)  | 50                        | 72.4            | 1.72      | 94.9           | 1.56      |
| P(M2)  | 110                       | 199             | 1.84      | 131.5          | 2.08      |

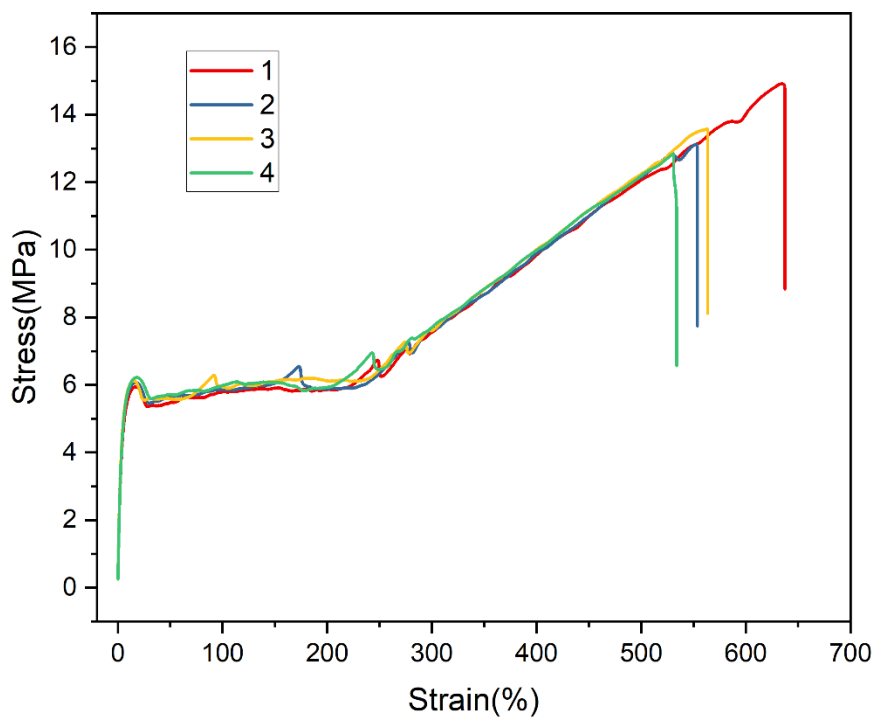

**Fig. S19** Stress-strain curves of P(M1)s.

**Table S5** Summary of mechanical properties of P(M1)s.<sup>[a]</sup>

| Entry   | $\sigma_Y$ (MPa) | $\sigma_B$ (MPa) | E (MPa)        | Elongation (%)  |
|---------|------------------|------------------|----------------|-----------------|
| 1       | 5.96             | 14.82            | 160            | 637             |
| 2       | 6.55             | 13.06            | 171            | 554             |
| 3       | 6.14             | 13.56            | 172            | 563             |
| 4       | 6.22             | 11.31            | 156            | 534             |
| Average | $6.22 \pm 0.25$  | $13.19 \pm 1.45$ | $165 \pm 7.97$ | $572 \pm 44.99$ |

[a] Condition: Tested by uniaxial tensile tests. Strain rate of 10 mm/min,  $\sigma_Y$ : yield strength,  $\sigma_B$ : break strength, E: Tensile modulus.

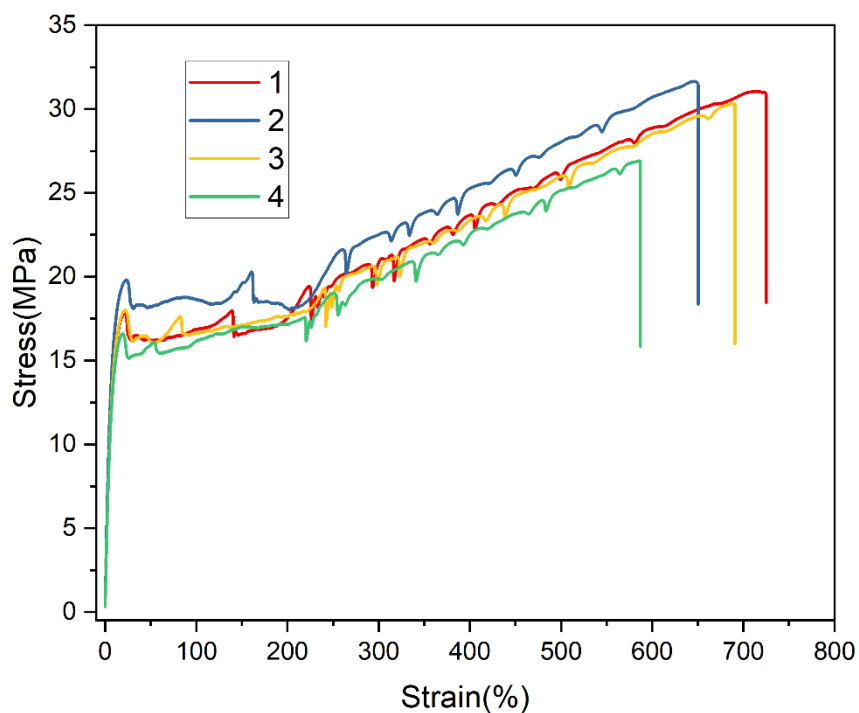

**Fig. S20** Stress-strain curves of P(M2)s.

**Table S6** Summary of mechanical properties of P(M2)s.<sup>[a]</sup>

| Entry   | $\sigma_Y$ (MPa) | $\sigma_B$ (MPa) | E (MPa)         | Elongation (%)  |
|---------|------------------|------------------|-----------------|-----------------|
| 1       | 17.81            | 30.82            | 238             | 725             |
| 2       | 19.82            | 31.43            | 289             | 650             |
| 3       | 17.99            | 30.27            | 229             | 690             |
| 4       | 16.56            | 26.90            | 233             | 586             |
| Average | $18.05 \pm 1.34$ | $29.86 \pm 2.02$ | $247 \pm 28.05$ | $663 \pm 59.64$ |

[a] Condition: Tested by uniaxial tensile tests. Strain rate of 10 mm/min,  $\sigma_Y$ : yield strength,  $\sigma_B$ : break strength, E: Tensile modulus.

## The Hydrolytic Stability Study

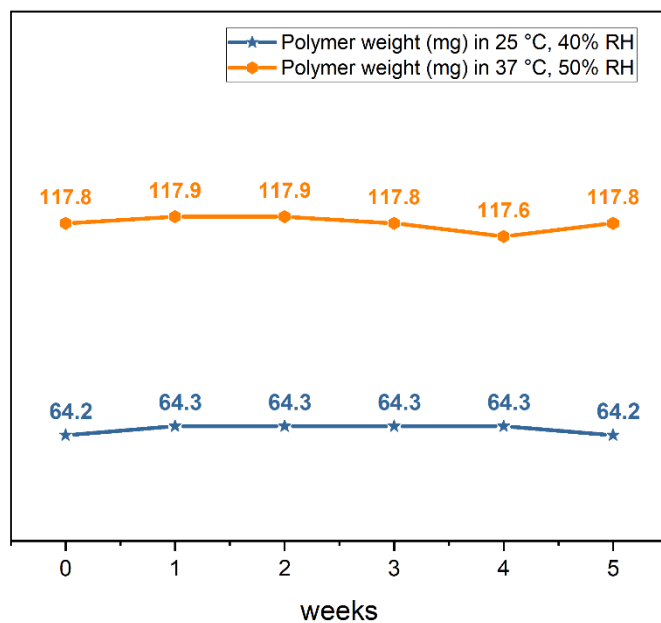

Fig. S21 The polymer weight change curves of P(M1).

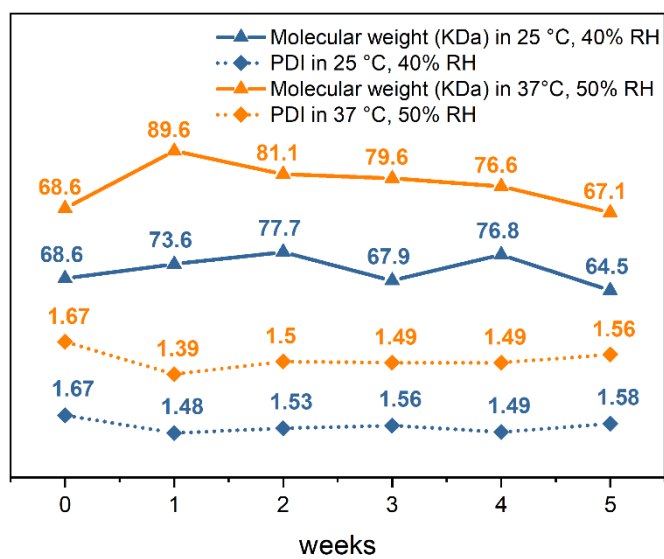

Fig. S22 The polymer weight change curves of P(M1).

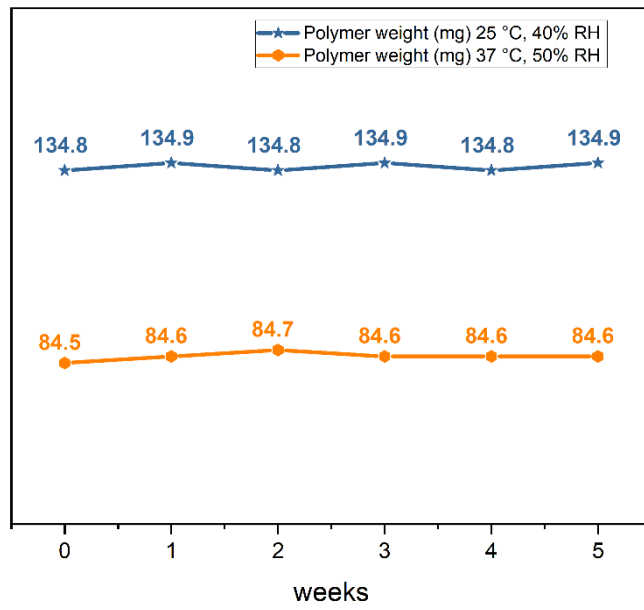

**Fig. S23** The polymer weight change curves of P(M2).

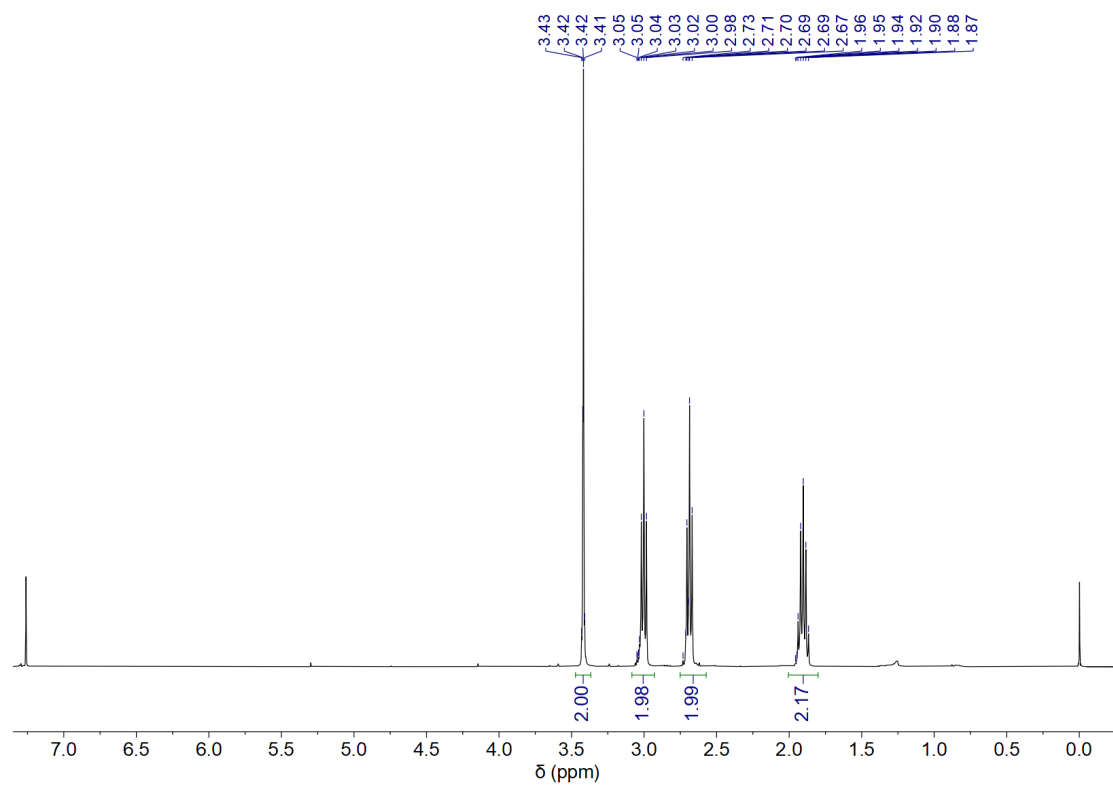

Fig. S24  $^1\text{H}$  NMR ( $\text{CDCl}_3$ , 25  $^\circ\text{C}$ ) spectrum of **M1** after 5 weeks.

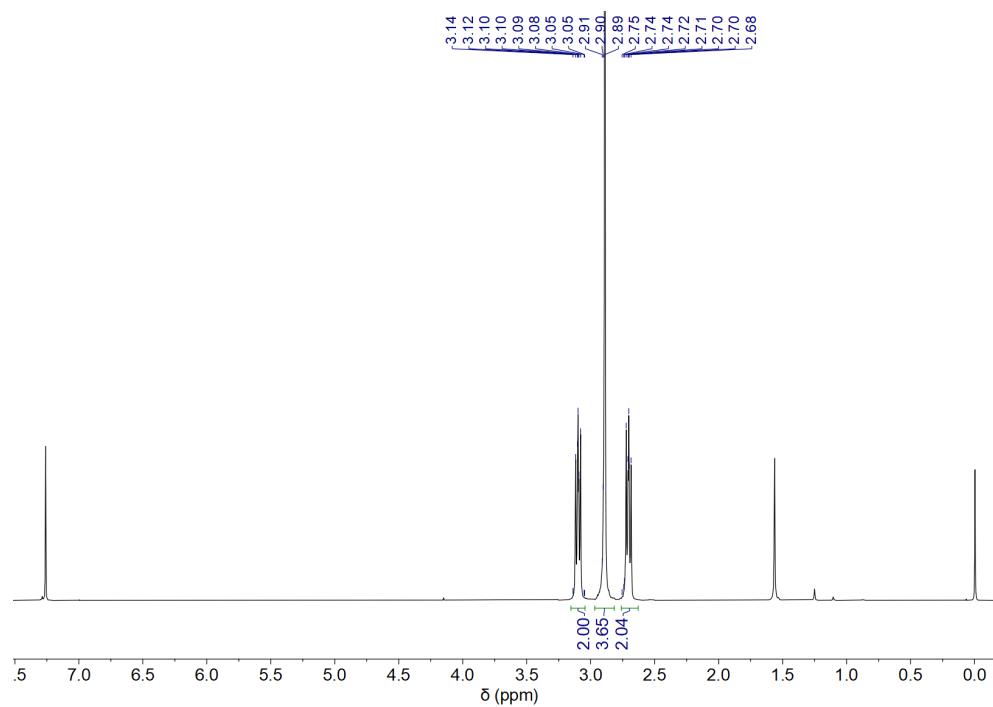

Fig. S25  $^1\text{H}$  NMR ( $\text{CDCl}_3$ , 25  $^\circ\text{C}$ ) spectrum of **M2** after 5 weeks.



## Thermodynamic Study

In an argon-filled glovebox, a DMSO- $d_6$  stock solution of monomer (0.5 mmol), TBD (0.01 mmol), and BnSH (0.01 mmol, [M]/[TBD]/[I] = 50/1/1) was prepared in a 5 mL volumetric flask. The mixture was stirred for 10 min, and the resulting solution was divided into 4 NMR tubes, with each tube containing 0.35 mL reaction solution. These four tubes were placed in four pre-heated oil baths at different temperature. The above procedure was repeated twice so that three parallel samples were studied at each temperature. After the reaction reached the equilibrium, each polymerization for the thermodynamic studies was quenched with 0.25 mL DMSO- $d_6$  with benzoic acid (2 wt.%). The monomer concentration at the equilibrium was determined by  $^1\text{H}$  NMR spectroscopy.

**Table S7** Raw data over equilibrium conversion at various temperatures for **M1**.

| Entry | T(K)   | Con. (%) | [M] <sub>0</sub> (mol/L) | T <sup>-1</sup> (K <sup>-1</sup> ) | [M] <sub>eq</sub><br>mol/L | ln[M] <sub>eq</sub> mol/L |
|-------|--------|----------|--------------------------|------------------------------------|----------------------------|---------------------------|
| 1     | 313.15 | 85.421   | 1                        | 0.00319                            | 0.14579                    | -1.925                    |
| 2     | 338.15 | 80.441   | 1                        | 0.00295                            | 0.19559                    | -1.6317                   |
| 3     | 363.15 | 77.061   | 1                        | 0.00275                            | 0.22939                    | -1.4723                   |
| 4     | 388.15 | 72.826   | 1                        | 0.00257                            | 0.27174                    | -1.3029                   |

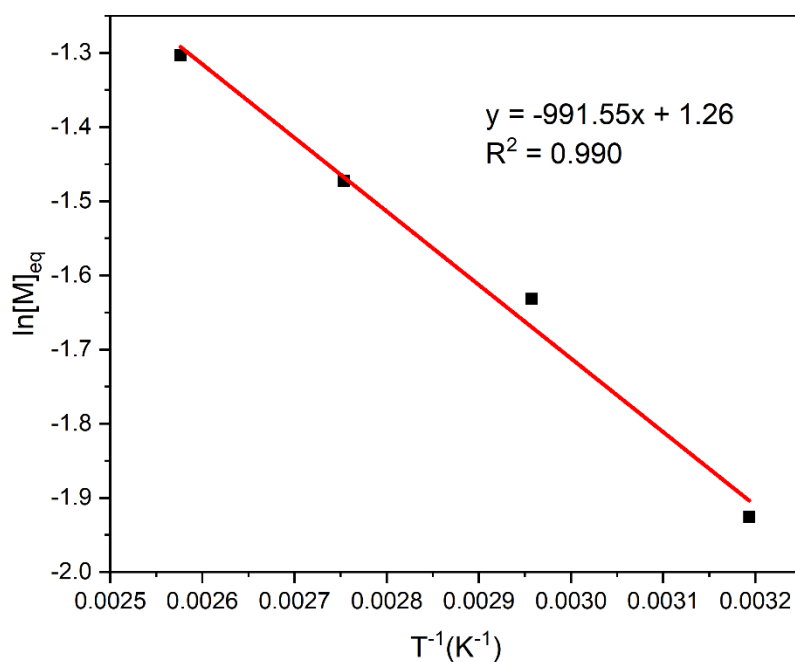

**Fig. S26** Van't Hoff plot of  $\ln[\mathbf{M1}]_{\text{eq}}$  vs. reciprocal of the absolute temperature ( $T^{-1}$ ).

The Van't Hoff plot of  $\ln[\mathbf{M1}]_{\text{eq}}$  versus  $T^{-1}$  gave a linear fitting with a slope of  $-991.55$  and an intercept of  $+1.26$ , from which the thermodynamic parameters were calculated to be  $\Delta H_p^\circ = -8.24 \text{ kJ mol}^{-1}$  and  $\Delta S_p^\circ = -10.49 \text{ J mol}^{-1} \text{ K}^{-1}$ , based on the equation  $\ln[\mathbf{M1}]_{\text{eq}} = \Delta H_p^\circ / RT - \Delta S_p^\circ / R$ , where  $R$  is the molar gas constant.  $T_c$  was calculated to be  $785 \text{ K}$  ( $512 \text{ }^\circ\text{C}$ ) at  $[\mathbf{M1}]_0 = 1 \text{ mol/L}$ , based on the equation  $T_c = \Delta H_p^\circ / (\Delta S_p^\circ + R \ln [\mathbf{M1}]_0)$ .

**Table S8** Raw data over equilibrium conversion at various temperatures for **M2**.

| Entry | T(K)   | Con. (%) | [M] <sub>0</sub> (mol/L) | T <sup>-1</sup> (K <sup>-1</sup> ) | [M] <sub>eq</sub> mol/L | ln[M] <sub>eq</sub> mol/L |
|-------|--------|----------|--------------------------|------------------------------------|-------------------------|---------------------------|
| 1     | 323.15 | 93.78    | 0.1                      | 0.003094                           | 0.006221                | -5.079                    |
| 2     | 363.15 | 84.36    | 0.1                      | 0.002753                           | 0.01564                 | -4.157                    |
| 3     | 383.15 | 77.97    | 0.1                      | 0.002609                           | 0.022028                | -3.815                    |
| 4     | 403.15 | 71.69    | 0.1                      | 0.002480                           | 0.028306                | -3.564                    |

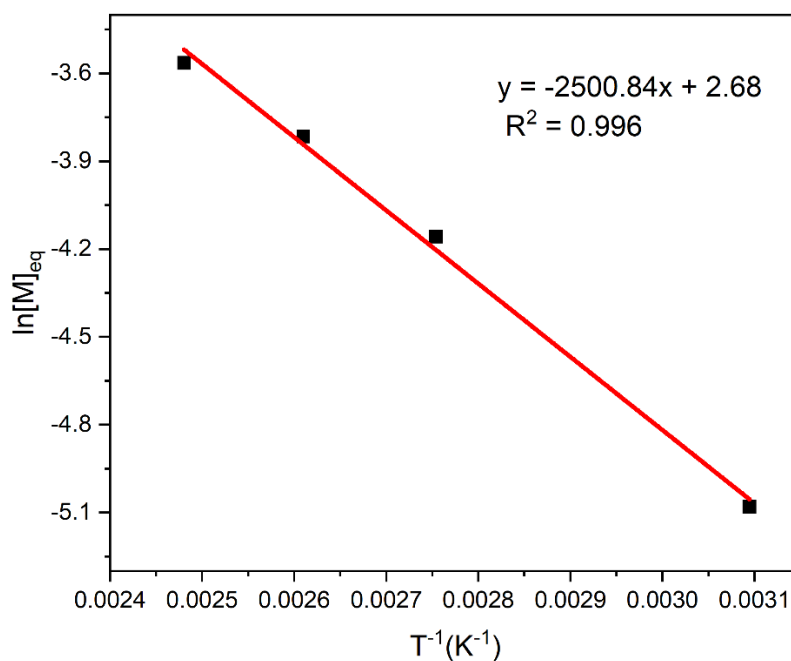

**Fig. S27** Van't Hoff plot of  $\ln[\mathbf{M2}]_{\text{eq}}$  vs. reciprocal of the absolute temperature ( $T^{-1}$ ).

The Van't Hoff plot of  $\ln[\mathbf{M2}]_{\text{eq}}$  versus  $T^{-1}$  gave a linear fitting with a slope of  $-2500.84$  and an intercept of  $+2.68$ , from which the thermodynamic parameters were calculated to be  $\Delta H_p^\circ = -20.79 \text{ kJ mol}^{-1}$  and  $\Delta S_p^\circ = -22.32 \text{ J mol}^{-1} \text{ K}^{-1}$ , based on the equation  $\ln[\mathbf{M2}]_{\text{eq}} = \Delta H_p^\circ / RT - \Delta S_p^\circ / R$ , where  $R$  is the molar gas constant.  $T_c$  was calculated to be  $931 \text{ K}$  ( $658 \text{ }^\circ\text{C}$ ) at  $[\mathbf{M2}]_0 = 1 \text{ mol/L}$ , based on the equation  $T_c = \Delta H_p^\circ / (\Delta S_p^\circ + R \ln [\mathbf{M2}]_0)$ .

## Bulk Thermal Chemical Recycle to Monomer

P(M1) and P(M2):

In a sublimation equipment, P(M1) or P(M2) and the catalyst were mixed and kept at 120–160 °C with stirring under vacuo for a certain time. After the reaction was stopped, the sublimate was collected, weighted, and characterized by  $^1\text{H}$  NMR spectroscopy.

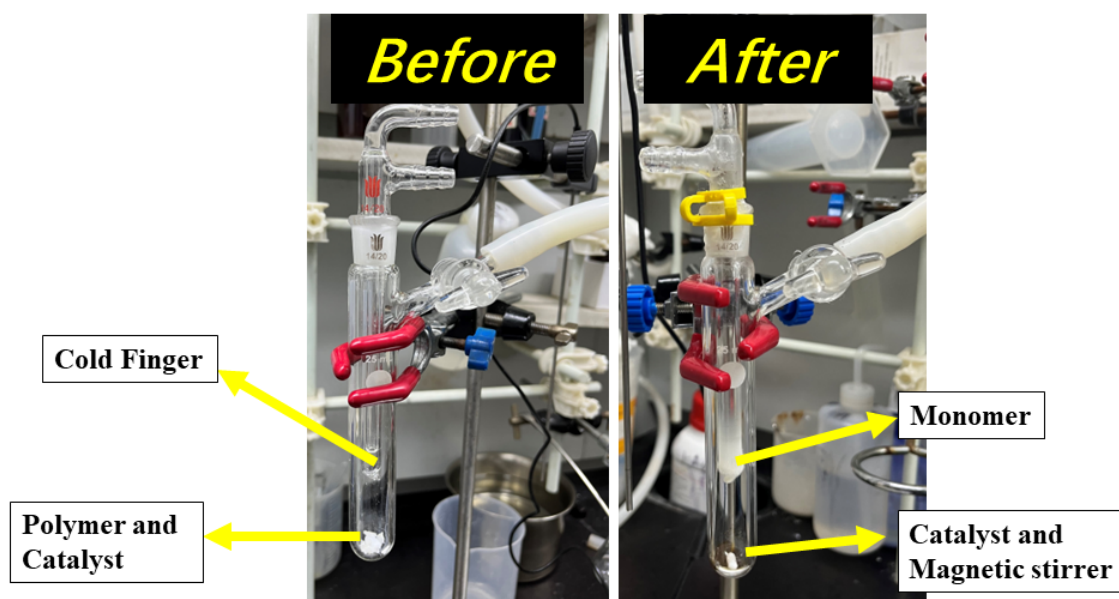

**Fig. S28** Thermal depolymerization of polymers to monomers via sublimation.

**Table S9** Results of bulk thermal depolymerization of **P(M1)**.

| Entry | Catalyst                  | Catalyst loading(mol%) | Temperature(°C) | Time(h) | Monomer yield <sup>[a]</sup> (%) |
|-------|---------------------------|------------------------|-----------------|---------|----------------------------------|
| 1     | Sn(Oct) <sub>2</sub> +PEO | 10                     | 150             | 11      | 93                               |
| 2     | Sn(Oct) <sub>2</sub>      | 0.025                  | 120             | 11      | 4                                |
| 3     | Sn(Oct) <sub>2</sub>      | 0.1                    | 150             | 10      | -                                |
| 4     | Sn(Oct) <sub>2</sub>      | 0.2                    | 150             | 10      | 7                                |
| 5     | Sn(Oct) <sub>2</sub>      | 0.5                    | 160             | 11      | 40                               |
| 6     | Sn(Oct) <sub>2</sub>      | 1                      | 150             | 11      | 93                               |
| 7     | Sn(AcO) <sub>2</sub>      | 2                      | 135             | 5       | 56                               |
| 8     | Sn(AcO) <sub>2</sub>      | 2                      | 135             | 11      | 90                               |
| 9     | Sn(AcO) <sub>2</sub>      | 2                      | 150             | 5       | 87                               |

[a] the monomer yield determined by the amount of the sublimate and the purity of recycled monomer determined by <sup>1</sup>H NMR spectroscopy.

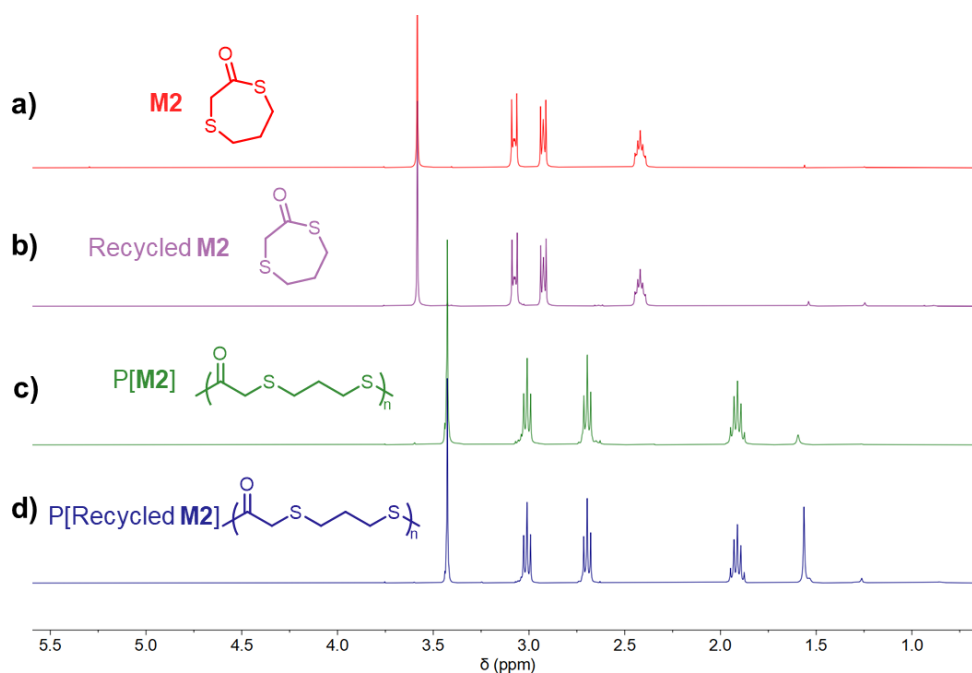**Fig. S29** <sup>1</sup>H NMR spectra of the recycled **M1** by the thermal depolymerization of **P(M1)**.

a) Starting **M1** for comparison; b) Recycled **M1** by the thermal depolymerization; c) **P(M1)** obtained by **[M1]/[TBD]/[I] = 500/1/1**; d) **P(M1)** (repolymerization) obtained by **[recycled M1]/[TBD]/[I] = 500/1/1**.

**Table S10** Results of bulk thermal depolymerization of **P(M2)**.

| Entry | Catalyst                                             | Catalyst loading(mol%) | Temperature(°C) | Time(h) | Monomer yield (%) <sup>[a]</sup> |
|-------|------------------------------------------------------|------------------------|-----------------|---------|----------------------------------|
| 1     | <sup>t</sup> BuOK                                    | 5                      | 175             | 10      | 50                               |
| 2     | <sup>t</sup> BuOK                                    | 10                     | 175             | 10      | 54                               |
| 3     | PhSNa                                                | 10                     | 170             | 11      | 60                               |
| 4     | Sn(Oct) <sub>2</sub> +PEO                            | 1                      | 150             | 11      | 32                               |
| 5     | Sn(Oct) <sub>2</sub> +PEO                            | 5                      | 150             | 11      | 54                               |
| 6     | Sn(Oct) <sub>2</sub>                                 | 5                      | 100             | 11      | 27                               |
| 7     | Sn(OAc) <sub>2</sub>                                 | 5                      | 100             | 11      | 23                               |
| 8     | Sb <sub>2</sub> O <sub>3</sub>                       | 10                     | 175             | 10      | -                                |
| 9     | La[N(SiMe <sub>3</sub> ) <sub>2</sub> ] <sub>3</sub> | 10                     | 170             | 10      | -                                |

[a] the monomer yield determined by the amount of the sublimate and the purity of recycled monomer determined by <sup>1</sup>H NMR spectroscopy.

**Table S11** Results for depolymerization of P(**M2**) in dilute solution.<sup>[a]</sup>

| Entry | Catalyst             | Catalyst loading(mol%) | Temperature (°C) | Time (h) | Conv. (%) <sup>[b]</sup> |
|-------|----------------------|------------------------|------------------|----------|--------------------------|
| 1     | <sup>t</sup> BuOK    | 5                      | 130              | 10       | -                        |
| 2     | TBD                  | 5                      | 130              | 10       | -                        |
| 3     | TBD                  | 5                      | 100              | 12       | -                        |
| 4     | Sn(Oct) <sub>2</sub> | 5                      | 160              | 10       | 57                       |
| 5     | Sn(OAc) <sub>2</sub> | 5                      | 160              | 11       | 62                       |
| 9     | Sn(OAc) <sub>2</sub> | 5                      | 160              | 48       | 62                       |

[a] Reaction conditions: [M] = 0.01 M. [b] Polymer conversion measured by <sup>1</sup>H NMR of the solution.

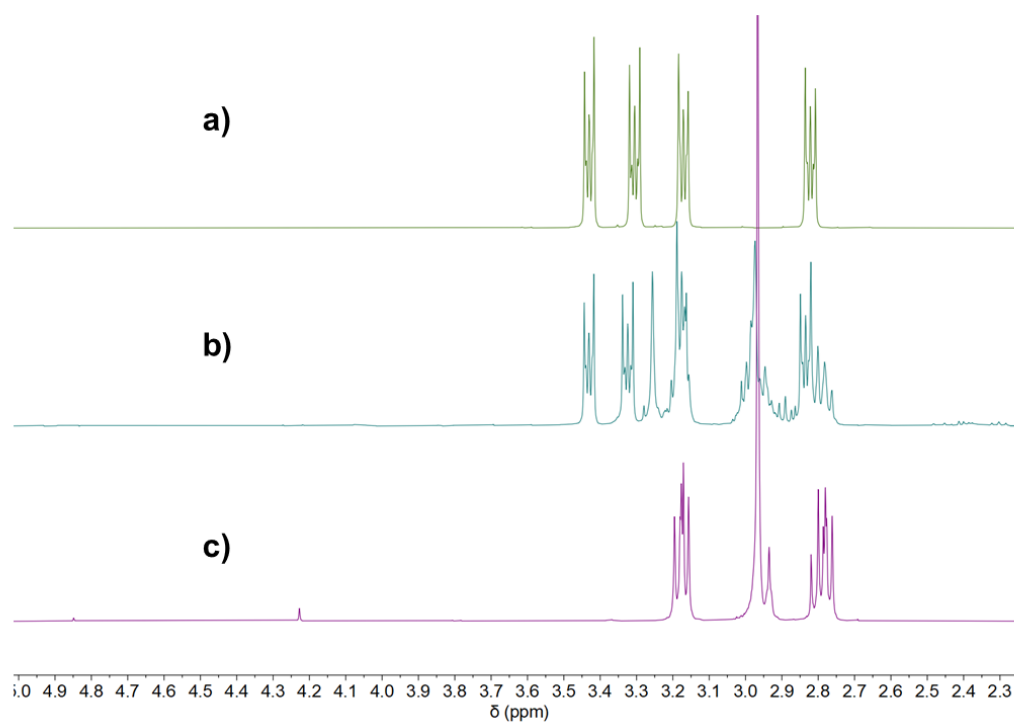

**Fig. S30** <sup>1</sup>H NMR spectra of the recycled **M2** by the dilute solution depolymerization of P(**M2**).

a) Starting **M2** for comparison; b) Depolymerization product of P(**M2**); c) P(**M2**) obtained by [M2]/[TBD]/[I] = 500/1/1.

**Table S12** Results of repolymerization of recycled **M1**.

| Entry | [M]/[Cat.]/[I] | Time (min) | Conv. <sup>[a]</sup> (%) | $M_{n,Calcd}$ <sup>[b]</sup> (kDa) | $M_{n,SEC}$ <sup>[c]</sup> (kDa) | $\mathcal{D}$ <sup>[c]</sup> |
|-------|----------------|------------|--------------------------|------------------------------------|----------------------------------|------------------------------|
| 1     | 100:1:1        | 10 min     | 95                       | 14.1                               | 5.58                             | 1.24                         |
| 2     | 500:1:1        | 10 min     | 92                       | 68.2                               | 9.88                             | 1.26                         |

[a] Monomer conversion measured by <sup>1</sup>H NMR of the quenched solution. [b] Calculated from  $[\mathbf{M}]_0/[\text{BnSH}]_0 \times \text{Conv.} \times \text{MW}_{\mathbf{M}} + \text{MW}_{\text{BnSH}}$ . [c] Number-average molecular weight ( $M_n$ ) and dispersity index ( $\mathcal{D} = M_w/M_n$ ), determined by Size-Exclusion Chromatography (SEC) at 40 °C in THF.



## Metal ion adsorption study with P(M1)

### General procedure for the preparation of 60 ppm metal ion solution.

Trivalent chromium standard solution (1000  $\mu\text{g}/\text{mL}$  in 5.0 wt% HCl) was purchased from Beijing North Weiye Institute of Measuring and Testing Technology. It was diluted with deionized water to prepare a  $\text{Cr}^{3+}$  stock solution with a concentration of  $\sim 60.0$  ppm.

$\text{CoCl}_2$  (55.1 mg) was dissolved in 25 mL of 1.0 mol/L  $\text{HNO}_3$  to prepare  $\text{Co}^{2+}$  solution with concentration of  $\sim 1000$   $\mu\text{g}/\text{mL}$ . It was diluted with deionized water to prepare a  $\text{Co}^{2+}$  stock solution with a concentration of  $\sim 60.0$  ppm.

$\text{LiCl}$  (152.7 mg) was dissolved in 25 mL of 1.0 mol/L  $\text{HNO}_3$  to prepare  $\text{Li}^+$  solution with concentration of  $\sim 1000$   $\mu\text{g}/\text{mL}$ . It was diluted with deionized water to prepare a  $\text{Li}^+$  stock solution with a concentration of  $\sim 60.0$  ppm.

$\text{MnCl}_2$  (57.3 mg) was dissolved in 25 mL of 1.0 mol/L  $\text{HNO}_3$  to prepare  $\text{Mn}^{2+}$  solution with concentration of  $\sim 1000$   $\mu\text{g}/\text{mL}$ . It was diluted with deionized water to prepare a  $\text{Mn}^{2+}$  stock solution with a concentration of  $\sim 60.0$  ppm.

$\text{CuSO}_4 \cdot 5\text{H}_2\text{O}$  (98.2 mg) was dissolved in 25 mL of 1.0 mol/L HCl to prepare  $\text{Cu}^{2+}$  solution with concentration of  $\sim 1000$   $\mu\text{g}/\text{mL}$ . It was diluted with deionized water to prepare a  $\text{Cu}^{2+}$  stock solution with a concentration of  $\sim 60.0$  ppm.

$\text{CdCO}_3$  (38.4 mg) was dissolved in 25 mL of 1.0 mol/L HCl to prepare  $\text{Cd}^{2+}$  solution with concentration of  $\sim 1000$   $\mu\text{g}/\text{mL}$ . It was diluted with deionized water to prepare a  $\text{Cd}^{2+}$  stock solution with a concentration of  $\sim 60.0$  ppm.

$\text{HAuCl}_4$  (43.12 mg) was dissolved in 25 mL of 1.0 mol/L HCl to prepare  $\text{Au}^{3+}$  solution with concentration of  $\sim 1000$   $\mu\text{g}/\text{mL}$ . It was diluted with deionized water to prepare a  $\text{Au}^{3+}$  stock solution with a concentration of  $\sim 60.0$  ppm.

Cobaltous chloride, Lithium chloride, Lead chloride, Copper sulfate pentahydrate, Chloroauric acid and Cadmium carbonate were purchased from Energy Chemical.

### General procedure of metal ion removal analysis.

4 mg P(M1) was dissolved in 100  $\mu\text{L}$  DCM with a stir bar, then add a 4.0 mL of metal ion solution (about 60 ppm). After the solution was stirred at room temperature for 2 h, the solvent was filtered through a 0.2  $\mu\text{m}$  syringe filter, and the metal ion concentration in the remained solution was determined by atomic absorption spectroscopy (AAS).

**Table S13** Adsorption of metal ions with P(**M1**).<sup>[a]</sup>

| Entry | Metal ions       | $m_{[PM1]}$<br>(mg) | Time (h) | $C_0$ (ppm)                                       | $C_f$ (ppm)                                       | Average Removal Efficiency <sup>[b]</sup> (%) | Standard Deviation |
|-------|------------------|---------------------|----------|---------------------------------------------------|---------------------------------------------------|-----------------------------------------------|--------------------|
|       |                  |                     |          | 1 <sup>st</sup> /2 <sup>nd</sup> /3 <sup>rd</sup> | 1 <sup>st</sup> /2 <sup>nd</sup> /3 <sup>rd</sup> |                                               |                    |
| 1     | Li <sup>+</sup>  | 4                   | 2        | 58.6/56.6/56.6                                    | 58.0/56.5/55.0                                    | 1.47                                          | 1.45               |
| 2     | Co <sup>2+</sup> | 4                   | 2        | 59.5/58.1/58.1                                    | 59.4/53.9/54.8                                    | 4.35                                          | 3.70               |
| 3     | Cr <sup>3+</sup> | 4                   | 2        | 60.2/57.1/57.1                                    | 59.7/57.0/56.3                                    | 0.80                                          | 0.61               |
| 4     | Cu <sup>2+</sup> | 4                   | 2        | 27.3/28.7/28.7                                    | 27.0/26.7/26.8                                    | 5.20                                          | 3.55               |
| 5     | Mn <sup>2+</sup> | 4                   | 2        | 54.4/57.1/57.1                                    | 53.9/56.6/54.6                                    | 2.13                                          | 2.05               |
| 6     | Cd <sup>3+</sup> | 4                   | 2        | 56.4/58.1/58.1                                    | 55.9/55.7/55.8                                    | 2.96                                          | 1.80               |
| 7     | Au <sup>3+</sup> | 4                   | 2        | 46.7/46.7/46.7                                    | 0.19/0.20/0.14                                    | 99.6                                          | 0.0577             |

[a]Carried out in aqueous solutions of metal ion compounds, the solutions were prepared with concentration of ~60 mg/L, and  $C_0$  is the real concentration measured by AAS. 4.0 mL of metal ion solution was directly added into DCM solution of P(**M1**).  $C_f$  is the concentration of the clear liquid after filtration. [b]Removal efficiency =  $(C_0 - C_f)/C_0 \times 100\%$ .

**Table S14** Adsorption of metal ions with P(**M1**) in mixed metal ions.<sup>[a]</sup>

| Entry | Metal ions       | $C_0$ (ppm) | $C_f$ (ppm) | Removal Efficiency <sup>[b]</sup> (%) |
|-------|------------------|-------------|-------------|---------------------------------------|
| 1     | Li <sup>+</sup>  | 57.1        | 56.8        | 0.52                                  |
| 2     | Co <sup>2+</sup> | 56.8        | 56.1        | 1.23                                  |
| 3     | Cr <sup>3+</sup> | 58.6        | 57.5        | 1.87                                  |
| 4     | Cu <sup>2+</sup> | 58.9        | 58.8        | 0.17                                  |
| 5     | Mn <sup>2+</sup> | 54.1        | 53.3        | 0.90                                  |
| 6     | Cd <sup>3+</sup> | 56.1        | 55.6        | 0.89                                  |
| 7     | Au <sup>3+</sup> | 42.9        | 1.93        | 95.5                                  |

[a]Carried out in aqueous solutions of metal ion compounds, the solutions were prepared with concentration of ~60 mg/L, and  $C_0$  is the real concentration measured by AAS. 4.0 mL of metal ion solution was directly added into DCM solution of P(**M1**).  $C_f$  is the concentration of the clear liquid after filtration. [b]Removal efficiency =  $(C_0 - C_f)/C_0 \times 100\%$ .

**Table S15** Au<sup>3+</sup> Adsorption with P(**M1**).<sup>[a]</sup>

| Entry | $m_{[P(M1)]}$ (mg) | Time (h) | $C_0$ (ppm) | $C_f$ (ppm) | Removal Efficiency <sup>[b]</sup> (%) |
|-------|--------------------|----------|-------------|-------------|---------------------------------------|
| 1     | 4                  | 2        | 46.69       | 0.19        | 99.6                                  |
| 2     | 4                  | 6        | 46.69       | 0.14        | 99.7                                  |
| 3     | 4                  | 6        | 1250        | 521         | 58.3                                  |

[a] Carried out in aqueous solutions of Au<sup>3+</sup> compounds, the solutions were prepared with different concentration, and  $C_0$  is the real concentration measured by AAS. 4.0 mL of Au<sup>3+</sup> solution was directly added into DCM solution of P(**M1**).  $C_f$  is the concentration of the clear liquid after filtration. [b] Removal efficiency =  $(C_0 - C_f) / C_0 \times 100\%$ .

### General procedure for the CRM of polymers under bulk thermal in vacuum.

The P(**M1**) adsorbent after the adsorption of Au(III) ions was dried in a vacuum oven at 60 °C for 24 h and then brought inside an argon-filled glovebox. It was transferred into a 25 mL sublimation. Then, the catalyst was added into it. After that, the equipment was sealed, brought outside of the glovebox, and heated in vacuum. The sublimate was collected, weighted, and characterized by <sup>1</sup>H NMR spectroscopy.

**Table S16** Results of bulk thermal chemical recycling of P(**M1**) - Au<sup>3+</sup>.

| Entry | Catalyst             | Catalyst loading(mol%) | Temperature(°C) | Time(h) | Monomer yield (%) <sup>[a]</sup> |
|-------|----------------------|------------------------|-----------------|---------|----------------------------------|
| 1     | Sn(Oct) <sub>2</sub> | 2                      | 170             | 10      | -                                |
| 2     | Sn(AcO) <sub>2</sub> | 2                      | 170             | 10      | -                                |
| 3     | Sn(AcO) <sub>2</sub> | 5                      | 140             | 12      | 70                               |
| 4     | Sn(AcO) <sub>2</sub> | 5                      | 140             | 12      | 73                               |

[a] the monomer yield determined by the amount of the sublimate and the purity of recycled monomer determined by <sup>1</sup>H NMR spectroscopy.

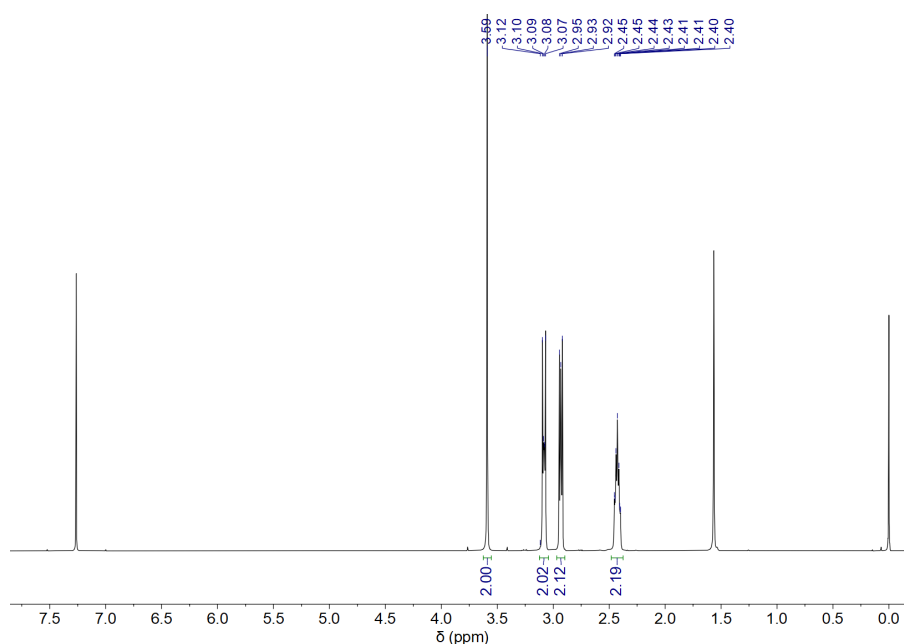

**Fig. S31** <sup>1</sup>H NMR (CDCl<sub>3</sub>, 25 °C) spectrum of recycled **M1** after depolymerization.

## MALDI-TOF MS of P(M1)

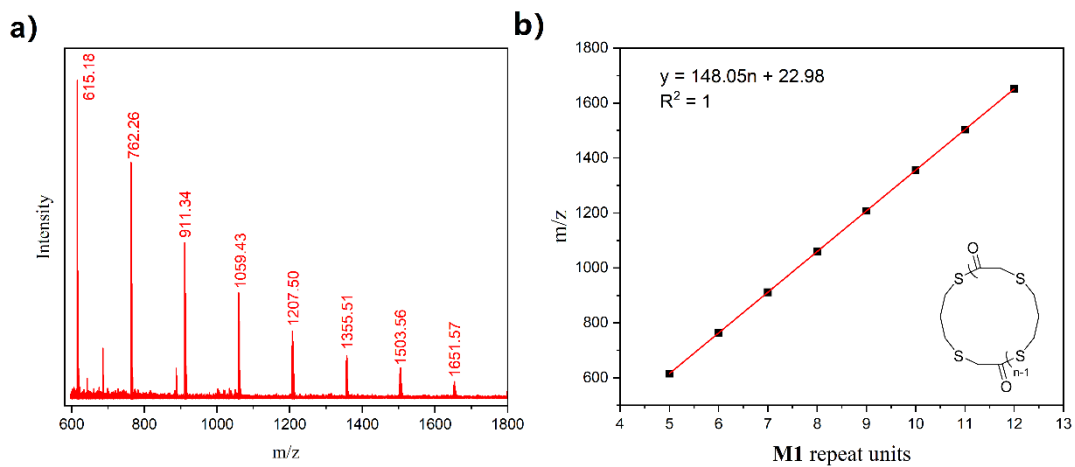

**Fig. S32** MALDI-TOF MS spectrum of the low-molecular-weight P(M1).

a) MALDI-TOF MS spectrum of the low-molecular-weight P(M1) produced by [M1]/[TBD]/[I] = 50/1/1.

b) linear plot of m/z values vs the number of M1 repeat units.

The spacing between the two neighboring molecular ion peaks corresponding to the exact molar mass of the repeat unit, M1 [mass/charge ratio (m/z) = 148.00], as shown by the slope of the linear plot of m/z values (y axis) versus the number of M1 repeat units (x axis). The intercept of the plot, 22.98, corresponding to circular structure of the polymer.

## Reference

1. C. M. Archer, J. R. Dilworth, J. D. Kelly, M. J. Rosser, Y. Zheng, *J. Chem. Soc., Dalton Trans.*, **1997**, 1403-1410.
